# Supplementary material
Source: ML conference proceedings conference paper supplement (https://openreview.net/forum?id=-8QSntMuqBV)
Supplement: supplementary_material [file attachment]

---

# The Many Faces of Adversarial Risk

---

**Muni Sreenivas Pydi**  
University of Wisconsin - Madison  
Madison, Wisconsin, USA  
pydi@wisc.edu

**Varun Jog**  
University of Cambridge  
Cambridge, UK  
vj270@cam.ac.uk

## Abstract

Adversarial risk quantifies the performance of classifiers on adversarially perturbed data. Numerous definitions of adversarial risk—not all mathematically rigorous and differing subtly in the details—have appeared in the literature. In this paper, we revisit these definitions, make them rigorous, and critically examine their similarities and differences. Our technical tools derive from optimal transport, robust statistics, functional analysis, and game theory. Our contributions include the following: generalizing Strassen’s theorem to the unbalanced optimal transport setting with applications to adversarial classification with unequal priors; showing an equivalence between adversarial robustness and robust hypothesis testing with  $\infty$ -Wasserstein uncertainty sets; proving the existence of a pure Nash equilibrium in the two-player game between the adversary and the algorithm; and characterizing adversarial risk by the minimum Bayes error between a pair of distributions belonging to the  $\infty$ -Wasserstein uncertainty sets. Our results generalize and deepen recently discovered connections between optimal transport and adversarial robustness and reveal new connections to Choquet capacities and game theory.

## 1 Introduction

Neural networks are known to be vulnerable to *adversarial attacks*, which are imperceptible perturbations to input data that maximize loss [42, 17, 7]. Developing algorithms resistant to such attacks has received considerable attention in recent years [10, 32, 27, 22], motivated by safety-critical applications such as autonomous driving [20, 31], medical imaging [19, 26, 24] and law [23, 8].

A classification algorithm with high accuracy (low risk) in the absence of an adversary may have poor accuracy (high risk) when an adversary is present. Thus, a modified notion known as *adversarial risk* is used to quantify the adversarial robustness of algorithms. Algorithms that minimize adversarial risk are deemed robust. Procedures for finding them have been effective in practice [27, 45, 32], spurring numerous theoretical investigations into adversarial risk and its minimizers.

There is no universally agreed upon definition of adversarial risk. Even the simplest setting of binary classification in  $\mathbb{R}^d$  with an  $\ell_2$  adversary admits various definitions involving set expansions [11, 18], transport maps [33], Markov kernels [35], and couplings [30]. These works broadly interpret adversarial risk as a measure of robustness to small perturbations, but their definitions differ in subtle details such as the class of adversaries and algorithms considered, budget constraints placed on the adversary, assumptions on the loss function, and the geometry of decision boundaries.

*Optimal adversarial risk* is most commonly defined as the minimax risk under adversarial contamination [27, 37]. Other notable characterizations include an optimal transport cost between data generating distributions in [34, 2, 12, 13], the optimal value of a distributionally robust optimization problem [40, 39, 44], and the value of a two-player zero-sum game [30, 33, 5, 6].

The diversity of definitions for adversarial risk makes it challenging to compare approaches. Moreover, not all approaches are rigorous. For instance, the classes of adversarial strategies and classifier

algorithms are often unclear, and issues of measurability are ignored. Although this may be harmless for applied research, it has led to incorrect proofs and insufficient assumptions in some theoretical works; a mathematically rigorous foundation for adversarial risk is essential for future research.

In this paper, we examine various notions of adversarial risk for binary classification in a non-parametric setting, where the decision boundary (or decision region) of a classifier is an arbitrary subset of the input space. We present rigorous definitions of adversarial risk and identify conditions under which these definitions are equivalent. We consider the general setting of Polish spaces (complete, separable metric spaces), and present stronger results for the Euclidean space ( $\mathbb{R}^d$ ). Our contributions are as follows:

- We examine the definition of adversarial risk based on set expansions. For Polish spaces, we observe that adversarial risk is not Borel measurable, and hence, not well-defined when the decision region is an arbitrary set. We show that the problem can be resolved by considering a Polish space equipped with the universal completion of the Borel  $\sigma$ -algebra and restricting the decision regions to Borel sets. For the Euclidean space with the Lebesgue  $\sigma$ -algebra, we show that adversarial risk is well-defined for any Lebesgue measurable decision region. Our key lemma (Lemma 4.3) shows that the Lebesgue  $\sigma$ -algebra is preferred over the Borel  $\sigma$ -algebra because set expansions are Lebesgue measurable but not necessarily Borel measurable. These results are contained in Section 4.
- We show that the definition of adversarial risk using set expansions is identical to a notion of risk that appears in robust hypothesis testing with  $\infty$ -Wasserstein uncertainty sets. We prove this result in Polish spaces using the theory of measurable selections [1, 47]. In  $\mathbb{R}^d$ , we are able to use the powerful theory of Choquet capacities [9] (in particular, Huber and Strassen’s 2-alternating capacities [21]) to establish results of a similar nature. These results are contained in Section 5.
- We consider the binary classification setup with unequal priors and show (under suitable assumptions) that the optimal adversarial risk from the above definitions is characterized by an unbalanced optimal transport cost between data-generating distributions. For both Polish spaces and  $\mathbb{R}^d$ , the main tool we use is Theorem 6.1 in which we generalize a classical result of Strassen on excess-cost optimal transport [41, 46] from probability measures to finite measures with possibly unequal mass. This generalizes results of [35, 2] on binary classification, which were only for equal priors. These results are contained in Section 6.
- We consider the setup of a zero-sum game between the adversary and the algorithm. We show that the value of this game (adversarial risk) is equal to the minimum Bayes error between a pair of distributions belonging to the  $\infty$ -Wasserstein uncertainty sets centered around true data-generating distributions. We prove the existence of a pure Nash equilibrium in this game for  $\mathbb{R}^d$  and for Polish spaces with a *midpoint property*. This extends/strengthens the results of [30, 33, 5] to non-parametric classifiers. These results are contained in Section 7.

The paper is organized as follows: In Section 2, we present preliminary definitions from optimal transport and metric space topology. In Section 3, we discuss various definitions of adversarial risk and present more related work. Sections 4, 5, 6 and 7 contain our main contributions summarized above. We conclude the paper in Section 8 and discuss future research directions.

We emphasize that rectifying measure theoretic issues with existing formulations of adversarial risk is one of our contributions, but not the main focus of our paper. We start our presentation with fixing measurability and well-definedness (in Section 4) because otherwise we will not be able to rigorously present our main results in the subsequent sections, namely: relation to robust hypothesis testing and Choquet capacities in section 5, generalizing the results of [2, 34] in section, 6 proving minimax theorems and existence of Nash equilibria and extending the results of [30, 5, 33] in section 7.

**Notation:** Throughout the paper, we use  $\mathcal{X}$  to denote a Polish space (a complete, separable metric space) with metric  $d$  and Borel  $\sigma$ -algebra  $\mathcal{B}(\mathcal{X})$ . For  $x \in \mathcal{X}$  and  $r \geq 0$ , let  $B_r(x)$  denote the closed ball of radius  $r$  centered at  $x$ . We use  $\mathcal{P}(\mathcal{X})$  and  $\mathcal{M}(\mathcal{X})$  to denote the space of probability measures and finite measures defined on the measure space  $(\mathcal{X}, \mathcal{B}(\mathcal{X}))$ , respectively. Let  $\overline{\mathcal{B}}(\mathcal{X})$  denote the universal completion of  $\mathcal{B}(\mathcal{X})$ . Let  $\overline{\mathcal{P}}(\mathcal{X})$  and  $\overline{\mathcal{M}}(\mathcal{X})$  denote the space of probability measures and finite measures defined on the complete measure space  $(\mathcal{X}, \overline{\mathcal{B}}(\mathcal{X}))$ . For  $\mu, \nu \in \mathcal{M}(\mathcal{X})$ , we say  $\nu$  *dominates*  $\mu$  if  $\mu(A) \leq \nu(A)$  for all  $A \in \mathcal{B}(\mathcal{X})$  and write  $\mu \preceq \nu$ . When  $\mathcal{X}$  is  $\mathbb{R}^d$ , we use  $\mathcal{L}(\mathcal{X})$  to

denote the Lebesgue  $\sigma$ -algebra and  $\lambda$  to denote the  $d$ -dimensional Lebesgue measure. Note that  $\mathcal{L}(\mathcal{X}) = \overline{\mathcal{B}}(\mathcal{X})$  for  $\mathcal{X} = \mathbb{R}^d$ . For a positive integer  $n$ , we use  $[n]$  to denote the finite set  $\{1, \dots, n\}$ .

## 2 Preliminaries

### 2.1 Metric Space Topology

We introduce three different notions of set expansions. For  $\epsilon \geq 0$  and  $A \in \mathcal{B}(\mathcal{X})$ , the  $\epsilon$ -Minkowski expansion of  $A$  is given by  $A^{\oplus\epsilon} := \cup_{a \in A} B_\epsilon(a)$ . The  $\epsilon$ -closed expansion of  $A$  is defined as  $A^\epsilon := \{x \in \mathcal{X} : d(x, A) \leq \epsilon\}$ , where  $d(x, A) = \inf_{a \in A} d(x, a)$ . The  $\epsilon$ -open expansion of  $A$  is defined as  $A^\epsilon := \{x \in \mathcal{X} : d(x, A) < \epsilon\}$ . We use the notation  $A^{-\epsilon}$  to denote  $((A^\epsilon)^c)^c$ . Similarly,  $A^{\ominus\epsilon} := ((A^c)^{\oplus\epsilon})^c$ . For example, consider the set  $A = (0, 1]$  in the space  $(\mathcal{X}, d) = (\mathbb{R}, |\cdot|)$  and  $\epsilon > 0$ . Then  $A^{\oplus\epsilon} = (-\epsilon, 1 + \epsilon]$ ,  $A^\epsilon = [-\epsilon, 1 + \epsilon]$  and  $A^\epsilon = (-\epsilon, 1 + \epsilon)$ . For any  $A \in \mathcal{B}(\mathcal{X})$ ,  $A^\epsilon$  is closed and  $A^\epsilon$  is open. Hence,  $A^\epsilon, A^\epsilon \in \mathcal{B}(\mathcal{X})$ . Moreover,  $A^\epsilon \subseteq A^{\oplus\epsilon} \subseteq A^\epsilon$ . However,  $A^{\oplus\epsilon}$  may not be in  $\mathcal{B}(\mathcal{X})$  (see Appendix for an example). In general, the Minkowski sum of two Borel sets need not be Borel [15], and that of two Lebesgue measurable sets need not be Lebesgue measurable [38].

### 2.2 Optimal Transport

Let  $\mu, \nu \in \mathcal{P}(\mathcal{X})$ . A *coupling* between  $\mu$  and  $\nu$  is a joint probability measure  $\pi \in \mathcal{P}(\mathcal{X}^2)$  with marginals  $\mu$  and  $\nu$ . The set  $\Pi(\mu, \nu) \subseteq \mathcal{P}(\mathcal{X}^2)$  denotes the set of all couplings between  $\mu$  and  $\nu$ . The *optimal transport cost* between  $\mu$  and  $\nu$  under a cost function  $c : \mathcal{X} \times \mathcal{X} \rightarrow [0, \infty)$  is defined as  $\mathcal{T}_c(\mu, \nu) = \inf_{\pi \in \Pi(\mu, \nu)} \int_{\mathcal{X}^2} c(x, x') d\pi(x, x')$ . For a positive integer  $p$ , the  $p$ -Wasserstein distance between  $\mu$  and  $\nu$  is defined as,  $W_p(\mu, \nu) = (\mathcal{T}_{d^p}(\mu, \nu))^{\frac{1}{p}}$ . The  $\infty$ -Wasserstein metric is defined as  $W_\infty(\mu, \nu) = \lim_{p \rightarrow \infty} W_p(\mu, \nu)$ . It can also be expressed in the following ways:

$$W_\infty(\mu, \nu) = \inf_{\pi \in \Pi(\mu, \nu)} \text{ess sup}_{(x, x') \sim \pi} d(x, x') = \inf\{\delta > 0 : \mu(A) \leq \nu(A^\delta) \forall A \in \mathcal{B}(\mathcal{X})\}. \quad (1)$$

Given a  $\mu \in \mathcal{P}(\mathcal{X})$  and a measurable function  $f : \mathcal{X} \rightarrow \mathcal{X}$ , the *push-forward* of  $\mu$  by  $f$  is defined as a probability measure  $f_{\#}\mu \in \mathcal{P}(\mathcal{X})$  given by  $f_{\#}\mu = \mu(f^{-1}(A))$  for all  $A \in \mathcal{B}(\mathcal{X})$ .

## 3 Adversarial Risk: Definitions and Related Work

We consider a binary classification setting on feature space  $\mathcal{X}$ . Let  $p_0, p_1 \in \mathcal{P}(\mathcal{X})$  be the data-generating distributions for labels 0 and 1, respectively. Let the prior probabilities for labels 0 and 1 be in the ratio  $T : 1$  where we assume  $T \geq 1$  without loss of generality. For a space of classifiers parametrized by  $w \in \mathcal{W}$  and a loss function  $\ell : (\mathcal{X} \times \mathcal{Y}) \times \mathcal{W} \rightarrow [0, \infty)$ , the adversarial risk of a classifier  $w \in \mathcal{W}$  under an adversarial budget of  $\epsilon \geq 0$  is defined as [27, 37],

$$R_{\oplus\epsilon}(\ell, w) = \mathbb{E}_{(x, y)} \left[ \sup_{d(x, x') \leq \epsilon} \ell((x', y), w) \right]. \quad (2)$$

If the loss function  $\ell(\cdot, w)$  is measurable, upper semi-continuous and bounded above for all  $w \in \mathcal{W}$ , [30] show that  $R_\epsilon(\ell, w)$  is well-defined. But in general, it may not be so. A case of special interest is the 0-1 loss function with non-parametric classifiers of the form  $f_A(x) := \mathbb{1}\{x \in A\}$  where  $A \in \mathcal{B}(\mathcal{X})$ . In this case,  $\ell_{0/1}((x, y), A) = \mathbb{1}\{x \in A, y = 0\} + \mathbb{1}\{x \in A^c, y = 1\}$ . Hence,

$$\begin{aligned} R_{\oplus\epsilon}(\ell_{0/1}, A) &= \frac{T}{T+1} \mathbb{E}_{p_0} \left[ \sup_{d(x, x') \leq \epsilon} \mathbb{1}\{x' \in A\} \right] + \frac{1}{T+1} \mathbb{E}_{p_1} \left[ \sup_{d(x, x') \leq \epsilon} \mathbb{1}\{x' \in A^c\} \right] \\ &= \frac{T}{T+1} p_0(A^{\oplus\epsilon}) + \frac{1}{T+1} p_1((A^c)^{\oplus\epsilon}). \end{aligned} \quad (3)$$

A problem with the formulation in equation 3 is the ambiguity over the measurability of the sets  $A^{\oplus\epsilon}$  and  $(A^c)^{\oplus\epsilon}$ . Even when  $A \in \mathcal{B}(\mathcal{X})$ , it is not guaranteed that  $A^{\oplus\epsilon}, (A^c)^{\oplus\epsilon} \in \mathcal{B}(\mathcal{X})$  (see Appendix for an example). Hence,  $R_{\oplus\epsilon}(\ell_{0/1}, A)$  is not well-defined for all  $A \in \mathcal{B}(\mathcal{X})$ . It is shown in [35] that  $R_{\oplus\epsilon}(\ell_{0/1}, A)$  is well-defined when  $A$  is either closed or open, but its validity beyond that is unknown.

A simple fix to this measurability problem is to use closed set expansion instead of the Minkowski set expansion, as done in [28]. This leads to the following formulation.

$$R_\epsilon(\ell_{0/1}, A) = \frac{T}{T+1} p_0(A^\epsilon) + \frac{1}{T+1} p_1((A^c)^\epsilon). \quad (4)$$

The above definition is well-defined for any  $A \in \mathcal{B}(\mathcal{X})$  because  $A^\epsilon$  and  $(A^c)^\epsilon$  are both closed and hence, measurable. However, under the above definition, a point  $x \in A$  may be perturbed to  $x' \in A^\epsilon$  such that  $d(x, x') > \epsilon$ . For example, when  $A = (0, 1)$ , we have  $A^\epsilon = [-\epsilon, \epsilon]$  and an adversary may transport  $x = \delta > 0$  to  $x' = -\epsilon$ , violating the budget constraint at  $x$ .

**Remark 1.** The formulations in equations (2), (3) and (4) can give a strictly positive adversarial risk even for a “perfect” (i.e. Bayes optimal) classifier. This is consistent with the literature on adversarial examples where even a perfect classifier is forced to make errors in the presence of evasion attacks. These formulations of adversarial risk correspond to “constant-in-the-ball” risk of [18] and “corrupted-instance” risk in [11, 28]. Here, an adversarial risk of zero is only possible if the supports of  $p_0$  and  $p_1$  are non-overlapping and separated by at least  $2\epsilon$ . This is not the case with other formulations of adversarial risk such as “exact-in-the-ball” risk [18], “prediction-change risk” and “error-region” risk [11, 28]. We focus on the “corrupted-instance” family of risks in this work.

Another approach to defining adversarial risk is by explicitly defining the class of adversaries of budget  $\epsilon$  as measurable transport maps  $f : \mathcal{X} \rightarrow \mathcal{X}$  that push-forward the true data distribution such that no point is transported by more than a distance of  $\epsilon$ ; i.e.,  $d(x, f(x)) \leq \epsilon$ . The transport map-based adversarial risk [33] is formally defined as follows:

$$R_{F_\epsilon}(\ell_{0/1}, A) = \sup_{\substack{f_0, f_1: \mathcal{X} \rightarrow \mathcal{X} \\ \forall x \in \mathcal{X}, d(x, f_i(x)) \leq \epsilon}} \frac{T}{T+1} f_{0\#p_0}(A) + \frac{1}{T+1} f_{1\#p_1}((A^c)). \quad (5)$$

Yet another definition uses the robust hypothesis testing framework with  $W_\infty$  uncertainty sets. In this approach, an adversary perturbs the true distribution  $p_i$  to a corrupted distribution  $p'_i$  such that  $W_\infty(p_i, p'_i) \leq \epsilon$ . From (1), this is equivalent to the existence of a coupling  $\pi \in \Pi(p_i, p'_i)$  such that  $\text{ess sup}_{(x, x') \sim \pi} d(x, x') \leq \epsilon$ . The adversarial risk with such an adversary is given by

$$R_{\Gamma_\epsilon}(\ell_{0/1}, A) = \sup_{W_\infty(p_1, p'_1), W_\infty(p_0, p'_0) \leq \epsilon} \frac{T}{T+1} p'_0(A) + \frac{1}{T+1} p'_1((A^c)). \quad (6)$$

Clearly,  $R_{F_\epsilon}(\ell_{0/1}, A) \leq R_{\Gamma_\epsilon}(\ell_{0/1}, A)$ , but conditions for equality were not studied in prior work. Moreover, their relation to set expansion-based definitions in (3) and (4) was also unknown.

Next we discuss some characterizations of optimal adversarial risk, defined as  $R_{\oplus\epsilon}^* := \inf_{A \in \mathcal{B}(\mathcal{X})} R_{\oplus\epsilon}(\ell_{0/1}, A)$ . In [34, 2], it is shown that  $R_\epsilon^* = \frac{1}{2}[1 - D_\epsilon(p_0, p_1)]$  for equal priors ( $T = 1$ ), where  $D_\epsilon$  is an optimal transport cost defined as follows.

**Definition 1** ( $D_\epsilon$  cost). Let  $\mu, \nu \in \mathcal{P}(\mathcal{X})$ . Let  $\epsilon \geq 0$ . Let  $c_\epsilon : \mathcal{X}^2 \rightarrow \{0, 1\}$  be such that  $c_\epsilon(x, x') = \mathbb{1}\{(x, x') \in \mathcal{X} \times \mathcal{X} : d(x, x') > 2\epsilon\}$ . Then for  $\mu, \nu \in \mathcal{P}(\mathcal{X})$  and  $\epsilon \geq 0$ ,  $D_\epsilon(\mu, \nu) = \mathcal{T}_{c_\epsilon}(\mu, \nu)$ .

For  $\epsilon = 0$ ,  $D_\epsilon$  reduces to the total variation distance. While  $D_0$  is a metric on  $\mathcal{P}(\mathcal{X})$ ,  $D_\epsilon$  (for  $\epsilon > 0$ ) is neither a metric nor a pseudometric [35].

Other formulations of optimal adversarial risk are inspired from game theory [33, 30, 5]. Consider a game between two players: (1) The adversary whose action space is pairs of distributions  $p'_0, p'_1 \in \overline{\mathcal{P}}(\mathcal{X})$ , and (2) The algorithm whose action space is the space of decision regions of the form  $A \in \mathcal{B}(\mathcal{X})$ . For  $T > 0$ , define  $r : \mathcal{B}(\mathcal{X}) \times \overline{\mathcal{P}}(\mathcal{X}) \times \overline{\mathcal{P}}(\mathcal{X}) \rightarrow [0, 1]$  as,  $r(A, \mu, \nu) = \frac{T}{T+1} \mu(A) + \frac{1}{T+1} \nu((A^c))$ . The payoff when the algorithm plays first is given by  $\inf_{A \in \mathcal{B}(\mathcal{X})} \sup_{W_\infty(p_0, p'_0), W_\infty(p_1, p'_1) \leq \epsilon} r(A, p'_0, p'_1)$ , and this quantity is interpreted as the optimal adversarial risk in this setup.

## 4 Well-Definedness of Adversarial Risk

As stated in Section 3,  $R_{\oplus\epsilon}(\ell_{0/1}, A)$  may not be well-defined for some decision regions  $A \in \mathcal{B}(\mathcal{X})$  because of the non-measurability of the sets  $A^{\oplus\epsilon}$  and  $(A^c)^{\oplus\epsilon}$ . Specifically, we have the following lemma.

Table 1: Summary of the adversarial risk definitions presented in Section 3.  $R_{\oplus\epsilon}$ ,  $R_\epsilon$ ,  $R_{F_\epsilon}$  and  $R_{\Gamma_\epsilon}$  denote adversarial risk defined using Minkowski set expansions, closed set expansions, transport maps and  $\infty$ -Wasserstein metric respectively.

| Risk                  | Adversary's action                                            | Perturbation  | $d(x, x') \leq \epsilon$ ?        | Well-defined?                                                                       |
|-----------------------|---------------------------------------------------------------|---------------|-----------------------------------|-------------------------------------------------------------------------------------|
| $R_{\oplus\epsilon}$  | $x \in A \rightarrow x' \in A^{\oplus\epsilon}$               | Random        | Yes, $\forall x$                  | $\mathbb{R}^d$ : Yes, for Lebesgue $A$<br>Polish $\mathcal{X}$ : Yes, for Borel $A$ |
| $R_\epsilon$          | $x \in A \rightarrow x' \in A^\epsilon$                       | Random        | No                                | Yes, for measurable $A$                                                             |
| $R_{F_\epsilon}$      | $x \rightarrow x' = f_i(x)$                                   | Deterministic | Yes, $\forall x$                  | Yes, for measurable $f_i$                                                           |
| $R_{\Gamma_\epsilon}$ | $p_i \rightarrow p'_i$<br>$W_\infty(p_i, p'_i) \leq \epsilon$ | Random        | Almost surely<br>yes, $\forall x$ | Yes                                                                                 |

**Lemma 4.1.** For any  $\epsilon > 0$ , there exists  $A \in \mathcal{B}(\mathcal{X})$  such that  $A^{\oplus\epsilon} \notin \mathcal{B}(\mathcal{X})$ .

In this section, we lay down the conditions under which the ambiguity can be resolved. We begin by presenting a Lemma that shows that  $A^{\oplus\epsilon}$  is an analytic set (i.e. a continuous image of a Borel set) whenever  $A$  is Borel. It is known that an analytic sets are universally measurable, i.e. they belong in  $\overline{\mathcal{B}}(\mathcal{X})$ , the universal completion of the Borel  $\sigma$ -algebra  $\mathcal{B}(\mathcal{X})$ , and are measurable with respect to any finite measure defined on the complete measure space,  $(\mathcal{X}, \overline{\mathcal{B}}(\mathcal{X}))$ .

**Lemma 4.2.** Let  $A \in \mathcal{B}(\mathcal{X})$ . Then,  $A^{\oplus\epsilon}$  is an analytic set. Consequently,  $A^{\oplus\epsilon} \in \overline{\mathcal{B}}(\mathcal{X})$ .

By virtue of the previous lemma, we have the following.

**Theorem 4.1.** Let  $p_0, p_1 \in \overline{\mathcal{P}}(\mathcal{X})$ . Then for any  $A \in \mathcal{B}(\mathcal{X})$ ,  $R_{\oplus\epsilon}(\ell_{0/1}, A)$  is well-defined.

For the special case of  $\mathcal{X} = \mathbb{R}^d$ , we can further strengthen Theorem 4.1 to include all Lebesgue measurable sets  $\mathcal{L}(\mathcal{X})$  instead of just Borel sets  $\mathcal{B}(\mathcal{X})$ . For this, we use the concept of porous sets.

**Definition 2** (Porous set). A set  $E \subseteq \mathcal{X}$  is said to be porous if there exists  $\alpha \in (0, 1)$  and  $r_0 > 0$  such that for every  $r \in (0, r_0]$  and every  $x \in \mathcal{X}$ , there is an  $x' \in \mathcal{X}$  such that  $B_{\alpha r}(x') \subseteq B_r(x) \setminus E$ .

Porous sets are a subclass of nowhere dense sets. Importantly,  $\lambda(E) = 0$  for any porous set  $E \subseteq \mathbb{R}^d$  [51]. By the following lemma, the set difference between the closed/open set expansions is porous.

**Lemma 4.3.** Let  $(\mathcal{X}, d) = (\mathbb{R}^d, \|\cdot\|)$  and  $A \in \mathcal{L}(\mathcal{X})$ . Then  $E = A^\epsilon \setminus A^\epsilon$  is porous.

Lemma 4.3 plays a crucial role in proving that  $A^{\oplus\epsilon} \in \mathcal{L}(\mathcal{X})$  whenever  $A \in \mathcal{L}(\mathcal{X})$ . We recall that  $A^{\oplus\epsilon}$  is the Minkowski sum of  $A$  with the closed  $\epsilon$ -ball. In general, the Minkowski sum of two Lebesgue measurable sets is not always Lebesgue measurable [38, 16]. So the fact that one of them is a closed ball in case of  $A^{\oplus\epsilon}$  is important. In the following theorem, we use Lemma 4.3 to prove the measurability of  $A^{\oplus\epsilon}$  and in turn prove that  $R_{\oplus\epsilon}(\ell_{0/1}, A)$  is well-defined for any  $A \in \mathcal{L}(\mathcal{X})$ .

**Theorem 4.2.** Let  $(\mathcal{X}, d) = (\mathbb{R}^d, \|\cdot\|)$ . Let  $p_0, p_1 \in \overline{\mathcal{P}}(\mathcal{X})$  and let  $\epsilon \geq 0$ . Then for any  $A \in \mathcal{L}(\mathcal{X})$ ,  $R_{\oplus\epsilon}(\ell_{0/1}, A)$  is well-defined. If, in addition,  $p_0$  and  $p_1$  are absolutely continuous with respect to the Lebesgue measure, then  $R_{\oplus\epsilon}(\ell_{0/1}, A) = R_\epsilon(\ell_{0/1}, A)$ .

## 5 Equivalence with $\infty$ -Wasserstein Robustness

In this section, we show the conditions under which  $R_{\oplus\epsilon}(\ell_{0/1}, A)$  is equivalent to other notions of adversarial risk based on transport maps and  $W_\infty$  robustness.

### 5.1 $W_\infty$ Robustness in Polish Spaces via Measurable Selections

We begin by presenting a lemma that links the measure of  $\epsilon$ -Minkowski set expansion to the worst case measure over a  $W_\infty$  probability ball of radius  $\epsilon$ .

**Lemma 5.1.** Let  $\mu \in \overline{\mathcal{P}}(\mathcal{X})$  and  $A \in \mathcal{B}(\mathcal{X})$ . Then  $\sup_{W_\infty(\mu, \mu') \leq \epsilon} \mu'(A) = \mu(A^{\oplus\epsilon})$ . Moreover, the supremum in the previous equation is achieved by a  $\mu^* \in \mathcal{P}(\mathcal{X})$  that is induced from  $\mu$  via a measurable transport map  $\phi : \mathcal{X} \rightarrow \mathcal{X}$  (i.e.  $\mu^* = \phi_{\#}\mu$ ) satisfying  $d(x, \phi(x)) \leq \epsilon$  for all  $x \in \mathcal{X}$ .

Table 2: Equivalences among adversarial risk formulations.  $R_{\oplus\epsilon}(A)$ ,  $R_\epsilon(A)$ ,  $R_{F_\epsilon}(A)$  and  $R_{\Gamma_\epsilon}(A)$  denote adversarial risk for 0-1 loss function ( $\ell_{0/1}$ ) for a binary classifier with decision region  $A$  (i.e.  $f_A(x) = \mathbf{1}\{x \in A\}$ ), defined using Minkowski set expansions, closed set expansions, transport maps and  $\infty$ -Wasserstein metric respectively.  $\mathcal{B}(\mathcal{X})$  and  $\mathcal{L}(\mathcal{X})$  denote the Borel and Lebesgue  $\sigma$ -algebras.  $(\mathcal{X}, \overline{\mathcal{B}}(\mathcal{X}))$  denotes the universal completion of the Borel measure space,  $(\mathcal{X}, \mathcal{B}(\mathcal{X}))$ .

| Equivalences in Adversarial Risk                                                     | Conditions                                                                                                                                   |
|--------------------------------------------------------------------------------------|----------------------------------------------------------------------------------------------------------------------------------------------|
| $R_{\oplus\epsilon}(A) = R_{\Gamma_\epsilon}(A)$                                     | $\mathbb{R}^d$ : $A \in \mathcal{L}(\mathcal{X})$ or $(\mathcal{X}, \overline{\mathcal{B}}(\mathcal{X}))$ : $A \in \mathcal{B}(\mathcal{X})$ |
| $R_{\oplus\epsilon}(A) = R_{\Gamma_\epsilon}(A) = R_{F_\epsilon}(A)$                 | $(\mathcal{X}, \overline{\mathcal{B}}(\mathcal{X}))$ : $A \in \mathcal{B}(\mathcal{X})$                                                      |
| $R_{\oplus\epsilon}(A) = R_{\Gamma_\epsilon}(A) = R_{F_\epsilon}(A) = R_\epsilon(A)$ | $\mathbb{R}^d$ : $A \in \mathcal{L}(\mathcal{X})$ and $p_0, p_1$ have densities                                                              |

A crucial step in the proof of Lemma 5.1 is finding a measurable transport map  $\phi$  such that  $\phi^{-1}(A) = A^{\oplus\epsilon}$  and  $d(x, \phi(x)) \leq \epsilon$  for all  $x \in \mathcal{X}$ . In the following theorem, we use Lemma 5.1 to establish the equivalence between three different notions of adversarial risk introduced in section 3.

**Theorem 5.1.** Let  $p_0, p_1 \in \overline{\mathcal{P}}(\mathcal{X})$  and  $A \in \mathcal{B}(\mathcal{X})$ . Then  $R_{\oplus\epsilon}(\ell_{0/1}, A) = R_{F_\epsilon}(\ell_{0/1}, A) = R_{\Gamma_\epsilon}(\ell_{0/1}, A)$ . In addition, the supremum over  $f_0$  and  $f_1$  in  $R_{F_\epsilon}(\ell_{0/1}, A)$  is attained. Similarly, the supremum over  $p'_0$  and  $p'_1$  in  $R_{\Gamma_\epsilon}(\ell_{0/1}, A)$  is attained.

## 5.2 $W_\infty$ Robustness in $\mathbb{R}^d$ via 2-Alternating Capacities

In this subsection, we establish a connection between adversarial risk and Choquet capacities [9] in  $\mathbb{R}^d$ . This connection allows us to extend Theorem 5.1 from Borel sets to the broader class of Lebesgue measurable sets. We will again use this connection for proving minimax theorems and existence of Nash equilibria in Section 7.1. We begin with the following definitions.

**Definition 3 (Capacity).** A set function  $v : \mathcal{B}(\mathcal{X}) \rightarrow [0, 1]$  is a *capacity* if it satisfies the following conditions: (1)  $v(\emptyset) = 0$  and  $v(\mathcal{X}) = 1$ ; (2) For  $A, B \in \mathcal{B}(\mathcal{X})$ ,  $A \subseteq B \implies v(A) \leq v(B)$ ; (3)  $A_n \uparrow A \implies v(A_n) \uparrow v(A)$ ; and (4)  $F_n \downarrow F$ ,  $F_n$  closed  $\implies v(F_n) \downarrow v(F)$ .

**Definition 4 (2-Alternating Capacity).** A capacity  $v$  defined on the measure space  $(\mathcal{X}, \mathcal{B}(\mathcal{X}))$  is called 2-alternating if  $v(A \cup B) + v(A \cap B) \leq v(A) + v(B)$  for all  $A, B \in \mathcal{B}(\mathcal{X})$ .

For any compact set of probability measures  $\Xi \subseteq \mathcal{P}(\mathcal{X})$ , the upper probability  $v(A) = \sup_{\mu \in \Xi} \mu(A)$  is a capacity [21]. The upper probability of  $\epsilon$ -neighborhoods of a  $\mu \in \mathcal{P}(\mathcal{X})$  defined using either the total variation metric or the Levy-Prokhorov metric can be shown to be a 2-alternating capacity [21]. The following lemma shows that  $A \mapsto \mu(A^{\oplus\epsilon})$  is a 2-alternating capacity under some conditions.

**Lemma 5.2.** Let  $(\mathcal{X}, d) = (\mathbb{R}^d, \|\cdot\|)$ . Let  $\mu \in \overline{\mathcal{P}}(\mathcal{X})$  and let  $\epsilon \geq 0$ . Define a set function  $v$  on  $\mathcal{X}$  such that for any  $A \in \mathcal{L}(\mathcal{X})$ ,  $v(A) := \mu(A^{\oplus\epsilon})$ . Then  $v$  is a 2-alternating capacity.

Now we relate the capacity defined in Lemma 5.2 to the  $W_\infty$  metric. Since the  $\epsilon$ -neighborhood of a  $\mu \in \mathcal{P}(\mathcal{X})$  in  $W_\infty$  metric is a compact set of probability measures [50], the upper probability over this  $W_\infty$   $\epsilon$ -ball is a capacity. The following lemma shows that it is a 2-alternating capacity, and identifies it with the capacity defined in Lemma 5.2.

**Lemma 5.3.** Let  $(\mathcal{X}, d) = (\mathbb{R}^d, \|\cdot\|)$ . Let  $\mu \in \overline{\mathcal{P}}(\mathcal{X})$ . Then for any  $A \in \mathcal{L}(\mathcal{X})$ ,  $\sup_{W_\infty(\mu, \mu') \leq \epsilon} \mu'(A) = \mu(A^{\oplus\epsilon})$ . Moreover, the supremum in the previous equation is attained.

Lemma 5.3 plays a similar role to Lemma 5.1 in proving the following equivalence between adversarial robustness and  $W_\infty$  robustness.

**Theorem 5.2.** Let  $(\mathcal{X}, d) = (\mathbb{R}^d, \|\cdot\|)$ . Let  $p_0, p_1 \in \overline{\mathcal{P}}(\mathcal{X})$  and let  $\epsilon \geq 0$ . Then for any  $A \in \mathcal{L}(\mathcal{X})$ ,  $R_{\oplus\epsilon}(\ell_{0/1}, A) = R_{\Gamma_\epsilon}(\ell_{0/1}, A)$ , and the supremum over  $p'_0$  and  $p'_1$  in  $R_{\Gamma_\epsilon}(\ell_{0/1}, A)$  is attained.

The proof follows by converting the expression for  $R_{\Gamma_\epsilon}$  into one for  $R_{\oplus\epsilon}$  using Lemma 5.3. Unlike Theorem 5.1, Theorem 5.2 does not show the equivalence of  $R_{F_\epsilon}(\ell_{0/1}, A)$  with the other definitions under the relaxed assumption of  $A \in \mathcal{L}(\mathcal{X})$ . This is because Lemma 5.3 does not provide a push-forward map  $\phi$  such that  $\mu^* = \phi_{\#}\mu$  with  $\mu^*$  attaining the supremum over the  $W_\infty$  ball.

## 6 Optimal Adversarial Risk via Generalized Strassen's Theorem

In section 5, we analyzed adversarial risk for a specific decision region  $A \in \mathcal{B}(\mathcal{X})$ . In this section, we analyze infimum of adversarial risk over all possible decision regions; i.e., the optimal adversarial risk. We show that optimal adversarial risk in binary classification with unequal priors is characterized by an unbalanced optimal transport cost between data-generating distributions. Our main technical lemma generalizes Strassen's theorem to unbalanced optimal transport. We present this result in subsection 6.1 and present our characterization of optimal adversarial risk in subsection 6.2.

### 6.1 Unbalanced Optimal Transport & Generalized Strassen's Theorem

Recall from Section 3 that the optimal transport cost  $D_\epsilon$  characterizes the optimal adversarial risk in binary classification for equal priors. The following result gives an alternative characterization of  $D_\epsilon$ .

**Proposition 6.1** (Strassen's theorem). [Corollary 1.28 in [46]] Let  $\mu, \nu \in \mathcal{P}(\mathcal{X})$ . Let  $\epsilon \geq 0$ . Then

$$\sup_{A \in \mathcal{B}(\mathcal{X})} \mu(A) - \nu(A^{2\epsilon}) = D_\epsilon(\mu, \nu). \quad (7)$$

Proposition 6.1 is a special case of Kantorovich-Rubinstein duality [46] applied to  $\{0, 1\}$ -valued cost functions. We now generalize this result to measures with unequal masses. We begin with some definitions that generalize the concepts we introduced in subsection 2.2.

Let  $\mu, \nu \in \mathcal{M}(\mathcal{X})$  be such that  $\mu(\mathcal{X}) \leq \nu(\mathcal{X})$ . A *coupling* between  $\mu$  and  $\nu$  is a measure  $\pi \in \mathcal{M}(\mathcal{X}^2)$  such that for any  $A \in \mathcal{B}(\mathcal{X})$ ,  $\pi(A \times \mathcal{X}) = \mu(A)$  and  $\pi(\mathcal{X} \times A) \leq \nu(A)$ . The set  $\Pi(\mu, \nu)$  is defined to be the set of all couplings between  $\mu$  and  $\nu$ . For a cost function  $c : \mathcal{X}^2 \rightarrow [0, \infty)$ , the optimal transport cost between  $\mu$  and  $\nu$  under  $c$  is defined as  $\mathcal{T}_c(\mu, \nu) = \inf_{\pi \in \Pi(\mu, \nu)} \int_{\mathcal{X}^2} c(x, x') d\pi(x, x')$ .

**Theorem 6.1** (Generalized Strassen's theorem). Let  $\mu, \nu \in \mathcal{M}(\mathcal{X})$  be such that  $0 < M = \mu(\mathcal{X}) \leq \nu(\mathcal{X})$ . Let  $\epsilon > 0$ . Define  $c_\epsilon : \mathcal{X}^2 \rightarrow \{0, 1\}$  as  $c_\epsilon(x, x') = \mathbf{1}\{(x, x') \in \mathcal{X}^2 : d(x, x') > 2\epsilon\}$ . Then

$$\sup_{A \in \mathcal{B}(\mathcal{X})} \mu(A) - \nu(A^{2\epsilon}) = \mathcal{T}_{c_\epsilon}(\mu, \nu) = M \inf_{\nu' \in \mathcal{P}(\mathcal{X}) : \nu' \preceq \nu/M} D_\epsilon(\mu/M, \nu'). \quad (8)$$

Moreover, the infimum on the right hand side is attained. (Equivalently, there is a coupling  $\pi \in \Pi(\mu, \nu)$  that attains the unbalanced optimal transport cost  $\mathcal{T}_{c_\epsilon}(\mu, \nu)$ .)

Our proof of Theorem 6.1 leverages strong duality in linear programming. We first establish (8) for discrete measures on a finite support. We then apply the discrete result on a sequence of measures supported on a countable dense subset of the Polish space  $\mathcal{X}$ . Using the tightness of finite measures on  $\mathcal{X}$ , we construct an optimal coupling that achieves the cost  $\mathcal{T}_{c_\epsilon}(\mu, \nu)$  in (8). We then show that the constructed coupling satisfies (8). This proof strategy is adapted from the works of [14] and [36].

### 6.2 Optimal Adversarial Risk for Unequal Priors

Generalized Strassen's theorem involves closed set expansions. The following lemma allows us to switch to Minkowski set expansions.

**Lemma 6.1.** Let  $\mu, \nu \in \overline{\mathcal{M}}(\mathcal{X})$  and let  $\epsilon \geq 0$ . Then  $\sup_{A \in \mathcal{B}(\mathcal{X})} \mu(A) - \nu(A^{2\epsilon}) = \sup_{A \in \mathcal{B}(\mathcal{X})} \mu(A^{\oplus \epsilon}) - \nu(A^{\oplus \epsilon})$ . Moreover, the supremum in the right hand side of the above equality can be replaced by a supremum over closed sets.

Using the above lemma and the generalized Strassen's theorem, we show the following result on optimal adversarial risk for unequal priors, generalizing the result of [34, 2].

**Theorem 6.2.** Let  $p_0, p_1 \in \overline{\mathcal{P}}(\mathcal{X})$  and let  $\epsilon \geq 0$ . Then,

$$\inf_{A \in \mathcal{B}(\mathcal{X})} R_{\oplus \epsilon}(\ell_{0/1}, A) = \frac{1}{T+1} \left[ 1 - \inf_{q \in \mathcal{P}(\mathcal{X}) : q \preceq T p_0} D_\epsilon(q, p_1) \right]. \quad (9)$$

Moreover, the infimum on the left hand side can be replaced by an infimum over closed sets.

The proof follows by using Lemma 6.1 to convert the expression with Minkowski expansion to one with closed expansions, followed by an application of Theorem 6.1 to arrive at the final optimal transport-based expression. Theorem 6.2 extends the result of [35] in two ways: (1) the infimum is

taken over all sets for which  $R_{\oplus\epsilon}(\ell_{0/1}, A)$  is well-defined, instead of restricting to closed sets, and (2) the priors on both labels can be unequal. We also note that for  $(\mathcal{X}, d) = (\mathbb{R}^d, \|\cdot\|)$ , (9) holds with the infimum on the left hand side taken over all  $A \in \mathcal{L}(\mathcal{X})$ .

## 7 Minimax Theorems and Nash Equilibria

In this section, we revisit the zero-sum game between the adversary and the algorithm introduced in section 3. Recall that for  $A \in \mathcal{B}(\mathcal{X})$  and  $p'_0, p'_1 \in \overline{\mathcal{P}}(\mathcal{X})$ , the payoff function is given by

$$r(A, p'_0, p'_1) = \frac{T}{T+1} p'_0(A) + \frac{1}{T+1} p'_1((A^c)). \quad (10)$$

The max-min inequality gives us

$$\sup_{W_\infty(p_0, p'_0), W_\infty(p_1, p'_1) \leq \epsilon} \inf_{A \in \mathcal{A}} r(A, p'_0, p'_1) \leq \inf_{A \in \mathcal{B}(\mathcal{X})} \sup_{W_\infty(p_0, p'_0), W_\infty(p_1, p'_1) \leq \epsilon} r(A, p'_0, p'_1). \quad (11)$$

If the inequality in (11) is an equality, we say that the game has zero duality gap, and admits a value equal to either expression in (11). Then there is no advantage to a player making the first move. Our minimax theorems establish such an equality. If in addition to having an equality in (11), there exist  $p_0^*, p_1^* \in \mathcal{P}(\mathcal{X})$  that achieve the supremum on the left-hand side and  $A^* \in \mathcal{B}(\mathcal{X})$  that achieves the infimum on the right-hand side, we say that  $((p_0^*, p_1^*), A^*)$  is a pure Nash equilibrium of the game.

In Section 7.1, we prove the minimax theorem and the existence of a pure Nash equilibrium in  $\mathbb{R}^d$  using the theory of 2-alternating capacities [21] and the relation to adversarial risk from Section 5.2. Section 7.2 extends these results to more general Polish spaces with a ‘‘midpoint property.’’

### 7.1 Minimax Theorem in $\mathbb{R}^d$ via 2-Alternating Capacities

The following theorem proves the minimax equality and the existence of a Nash equilibrium for the adversarial robustness game in  $\mathbb{R}^d$ .

**Theorem 7.1** (Minimax theorem in  $\mathbb{R}^d$ ). Let  $(\mathcal{X}, d) = (\mathbb{R}^d, \|\cdot\|)$ . Let  $p_0, p_1 \in \overline{\mathcal{P}}(\mathcal{X})$  and let  $\epsilon \geq 0$ . Define  $r$  as in (10). Then,

$$\sup_{W_\infty(p_0, p'_0), W_\infty(p_1, p'_1) \leq \epsilon} \inf_{A \in \mathcal{L}(\mathcal{X})} r(A, p'_0, p'_1) = \inf_{A \in \mathcal{L}(\mathcal{X})} \sup_{W_\infty(p_0, p'_0), W_\infty(p_1, p'_1) \leq \epsilon} r(A, p'_0, p'_1). \quad (12)$$

Moreover, there exist  $p_0^*, p_1^* \in \overline{\mathcal{P}}(\mathcal{X})$  and  $A^* \in \mathcal{L}(\mathcal{X})$  that achieve the supremum and infimum on the left and right hand sides of the above equation.

Crucial to the proof of Theorem 7.1 is Lemma 5.2, which shows that the set-valued maps  $A \mapsto p_0(A^{\oplus\epsilon})$  and  $A^c \mapsto p_1((A^c)^{\oplus\epsilon})$  are 2-alternating capacities. The same proof technique is not applicable in general Polish spaces because the map  $A \mapsto \mu(A^{\oplus\epsilon})$  is not a capacity for a general  $\mu \in \overline{\mathcal{P}}(\mathcal{X})$ . This is because  $A^{\oplus\epsilon}$  is not measurable for all  $A \in \overline{\mathcal{B}}(\mathcal{X})$ .

### 7.2 Minimax Theorem in Polish Spaces via Optimal Transport

We now extend the minimax theorem from  $\mathbb{R}^d$  to general Polish spaces with the following property.

**Definition 5** (Midpoint property). A metric space  $(\mathcal{X}, d)$  is said to have the midpoint property if for every  $x_1, x_2 \in \mathcal{X}$ , there exists  $x \in \mathcal{X}$  such that,  $d(x_1, x) = d(x, x_2) = d(x_1, x_2)/2$ .

Any normed vector space with distance defined as  $d(x, x') = \|x - x'\|$  satisfies the midpoint property. An example of a metric space without this property is the discrete metric space where  $d(x, x') = \mathbb{1}\{x \neq x'\}$ . The midpoint property plays a crucial role in proving the following theorem, which shows that the  $D_\epsilon$  transport cost between two distributions is the shortest total variation distance between their  $\epsilon$ -neighborhoods in  $W_\infty$  metric. A similar result was also presented in [13].

**Theorem 7.2** ( $D_\epsilon$  as shortest  $D_{TV}$  between  $W_\infty$  balls). Let  $(\mathcal{X}, d)$  have the midpoint property. Let  $\mu, \nu \in \overline{\mathcal{P}}(\mathcal{X})$  and let  $\epsilon \geq 0$ . Then  $D_\epsilon(\mu, \nu) = \inf_{W_\infty(\mu, \mu'), W_\infty(\nu, \nu') \leq \epsilon} D_{TV}(\mu', \nu')$ . Moreover, the infimum over  $D_{TV}$  in the above equation is attained.

The following theorem uses Theorem 7.2 to prove the minimax equality and the existence of a Nash equilibrium for any Polish space with the midpoint property for the case of equal priors.



**Theorem 7.3** (Minimax theorem for equal priors). Let  $(\mathcal{X}, d)$  have the midpoint property. Let  $p_0, p_1 \in \overline{\mathcal{P}}(\mathcal{X})$  and let  $\epsilon \geq 0$ . Define  $r$  as in (10) with  $T = 1$ . Then

$$\sup_{W_\infty(p_0, p'_0), W_\infty(p_1, p'_1) \leq \epsilon} \inf_{A \in \mathcal{B}(\mathcal{X})} r(A, p'_0, p'_1) = \inf_{A \in \mathcal{B}(\mathcal{X})} \sup_{W_\infty(p_0, p'_0), W_\infty(p_1, p'_1) \leq \epsilon} r(A, p'_0, p'_1). \quad (13)$$

Moreover, there exist  $p_0^*, p_1^* \in \mathcal{P}(\mathcal{X})$  that achieve the supremum on the left hand side.

*Proof.* For  $\mu \in \overline{\mathcal{P}}(\mathcal{X})$ , let  $WB(\mu)$  denote the set of all  $\mu' \in \overline{\mathcal{P}}(\mathcal{X})$  such that  $W_\infty(\mu, \mu') \leq \epsilon$ .

$$\begin{aligned} \inf_{A \in \mathcal{B}(\mathcal{X})} \sup_{\substack{p'_0 \in WB(p_0) \\ p'_1 \in WB(p_1)}} r(A, p'_0, p'_1) &= \inf_{A \in \mathcal{B}(\mathcal{X})} R_{\Gamma_\epsilon}(\ell_{0/1}, A) \stackrel{(i)}{=} \inf_{A \in \mathcal{B}(\mathcal{X})} R_{\oplus \epsilon}(\ell_{0/1}, A) \stackrel{(ii)}{=} \frac{1}{2} [1 - D_\epsilon(p_0, p_1)] \\ \sup_{\substack{p'_0 \in WB(p_0) \\ p'_1 \in WB(p_1)}} \inf_{A \in \mathcal{B}(\mathcal{X})} r(A, p'_0, p'_1) &\stackrel{(iii)}{=} \sup_{\substack{p'_0 \in WB(p_0) \\ p'_1 \in WB(p_1)}} \frac{1}{2} [1 - D_{TV}(p'_0, p'_1)] = \frac{1}{2} \left[ 1 - \inf_{\substack{p'_0 \in WB(p_0) \\ p'_1 \in WB(p_1)}} D_{TV}(p'_0, p'_1) \right], \end{aligned}$$

where (i) follows from Theorem 5.1, (ii) from Theorem 6.2, and (iii) again from Theorem 6.2 with  $\epsilon = 0$ . The expressions on the right extremes of the above equations are equal by Theorem 7.2. The existence of  $p_0^*, p_1^* \in \overline{\mathcal{P}}(\mathcal{X})$  follows Theorem 7.2.  $\square$

To prove the minimax theorem for unequal priors, we need the following generalization of Theorem 7.2 to finite measures of unequal mass.

**Lemma 7.1.** Let  $p_0, p_1 \in \overline{\mathcal{P}}(\mathcal{X})$  and let  $\epsilon \geq 0$ . Then for  $T \geq 1$ ,

$$\begin{aligned} \inf_{q \in \overline{\mathcal{P}}(\mathcal{X}): q \preceq T p_0} D_\epsilon(q, p_1) &= \inf_{q \in \overline{\mathcal{P}}(\mathcal{X}): q \preceq T p_0} \inf_{W_\infty(q, q'), W_\infty(p_1, p'_1) \leq \epsilon} D_{TV}(q', p'_1) \\ &= \inf_{W_\infty(p_0, p'_0), W_\infty(p_1, p'_1) \leq \epsilon} \inf_{q' \in \overline{\mathcal{P}}(\mathcal{X}): q' \preceq T p'_0} D_{TV}(q', p'_1) \end{aligned} \quad (14)$$

Now, we prove the minimax equality for unequal priors.

**Theorem 7.4** (Minimax theorem for unequal priors). Let  $(\mathcal{X}, d)$  have the midpoint property. Let  $p_0, p_1 \in \overline{\mathcal{P}}(\mathcal{X})$  and let  $\epsilon \geq 0$ . For  $T > 0$ , define  $r$  as in (10). Then

$$\sup_{W_\infty(p_0, p'_0), W_\infty(p_1, p'_1) \leq \epsilon} \inf_{A \in \mathcal{B}(\mathcal{X})} r(A, p'_0, p'_1) = \inf_{A \in \mathcal{B}(\mathcal{X})} \sup_{W_\infty(p_0, p'_0), W_\infty(p_1, p'_1) \leq \epsilon} r(A, p'_0, p'_1). \quad (15)$$

The proof uses: (1) the characterization of inf-sup payoff in terms of unbalanced optimal transport using Theorem 5.1; (2) Lemma 7.1; and (3) the minimax equality of Theorem 7.3 for equal priors.

**Remark 2.** Unlike Theorem 7.1, Theorems 7.3 and 7.4 do not guarantee the existence of an optimal decision region  $A^*$ . While Theorem 7.3 guarantees the existence of worst-case pair of perturbed distributions  $p_0^*, p_1^*$ , Theorem 7.4 does not do so. Nevertheless, an approximate pure Nash equilibrium exists in all the cases. This is in sharp contrast with the non-existence of Nash equilibrium proven in [33] (which considers a different notion of adversarial perturbations).

**Remark 3.** A recent work [30] shows the existence of mixed Nash equilibrium for randomized classifiers parametrized by points in a Polish space (see also [33, 5]). Fan's minimax theorem used in this result is inapplicable in our setting of non-parametric, decision region-based classifiers. Instead, we applied the theory of Choquet capacities (in  $\mathbb{R}^d$ ) and generalized Strassen's duality theorem (in Polish spaces), which is novel to the best of our knowledge.

## 8 Discussion

We examined different notions of adversarial risk in a binary classification setting with 0-1 loss function and laid down the conditions under which these definitions are equivalent. By verifying the conditions in Sections 4 and 5, researchers may use different definitions interchangeably. Several definitions have also been proposed for adversarial risk under general loss functions [35, 30] using analogous constructions like transport maps, couplings and suprema over  $\epsilon$ -neighborhoods. Extending our equivalence results to more general loss functions is left for future work.

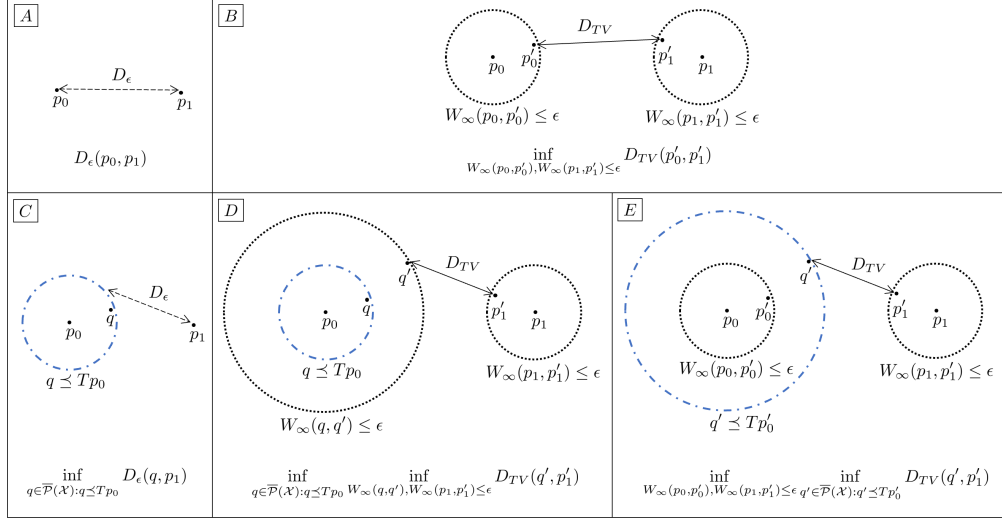

Figure 1: Illustration of various equivalent formulations of the optimal adversarial risk. The equalities summarize the results of Section 6 and Section 7. For equal priors ( $T = 1$ ),  $\boxed{A}$  and  $\boxed{B}$  denote two ways of obtaining the optimal adversarial risk,  $R_{\oplus\epsilon}^*$ : 1)  $\boxed{A}$ , which denotes the  $D_\epsilon$  cost between the true label distributions  $p_0$  and  $p_1$ , and 2)  $\boxed{B}$ , which denotes the shortest total variation distance between  $\infty$ -Wasserstein balls of radius  $\epsilon$  around  $p_0$  and  $p_1$ . For unequal priors ( $T > 1$ ),  $\boxed{C}$ ,  $\boxed{D}$  and  $\boxed{E}$  denote three equivalent ways of obtaining  $R_{\oplus\epsilon}^*$ . The black dotted balls denote  $\infty$ -Wasserstein balls and the blue dashed balls denote sets defined using stochastic domination. The order in which the two types of balls appear around  $p_0$  is reversed between  $\boxed{D}$  and  $\boxed{E}$ .

We analyzed optimal adversarial risk for (non-parametric) decision region-based classifiers. Using a formulation of optimal transport between finite measures of unequal mass, we extended the optimal transport based characterization of adversarial risk of [34, 2] to unequal priors by generalizing Strassen’s theorem. This may find applications in the study of excess cost optimal transport [49, 48]. A recent work [43] obtains a different characterization of optimal adversarial risk using optimal transport on the product space  $\mathcal{X} \times \mathcal{Y}$  where  $\mathcal{Y}$  is the label space. Further, they show the evolution of the optimal classifier  $A^*$  as  $\epsilon$  grows, in terms of a mean curvature flow. This raises an interesting question on the evolution of the optimal adversarial distributions  $p_0^*, p_1^* \in \overline{\mathcal{P}}(\mathcal{X})$  with  $\epsilon$ .

We proved a minimax theorem for adversarial robustness game and the existence of a Nash equilibrium. We constructed the worst-case pair of distributions  $p_0^*, p_1^* \in \overline{\mathcal{P}}(\mathcal{X})$  in terms of true data distributions and showed that their total variation distance gives the optimal adversarial risk. Identifying worst case distributions could lead to a new approach to developing robust algorithms.

We used Choquet capacities for results in  $\mathbb{R}^d$  and measurable selections in Polish spaces. Specifically, we showed that the measure of  $\epsilon$ -Minkowski expansion is a 2-alternating capacity. This connection could help generalize our results to total variation and Prokhorov distance based contaminations.

**Limitations:** We largely focused on the binary classification setup with 0-1 loss function. While it may be possible extend our results on measurability and relation to  $\infty$ -Wasserstein distributional robustness to more general loss functions and a multi-class setup, it is unclear how our results on generalized Strassen’s theorem and Nash equilibria can be extended further. Our results on various equivalent formulations of optimal adversarial risk are specific to adversarial perturbations (or equivalently,  $\infty$ -Wasserstein distributional perturbations), and we did not investigate more general perturbation models.

## References

- [1] D. P. Bertsekas and S. E. Shreve. *Stochastic optimal control: the discrete-time case*, volume 5. Athena Scientific, 1996.
- [2] A.N. Bhagoji, D. Cullina, and P. Mittal. Lower bounds on adversarial robustness from optimal transport. In *Advances in Neural Information Processing Systems*, pages 7496–7508, 2019.
- [3] P. Billingsley. *Convergence of Probability Measures*. Wiley Series in Probability and Statistics, 1999.
- [4] V. I. Bogachev. *Measure Theory*, volume 2. Springer Science & Business Media, 2007.
- [5] A.J. Bose, G. Gidel, H. Berrard, A. Cianflone, P. Vincent, S. Lacoste-Julien, and W.L. Hamilton. Adversarial example games. *Advances in Neural Information Processing Systems*, 2020.
- [6] S.R. Bulò, B. Biggio, I. Pillai, M. Pelillo, and F. Roli. Randomized prediction games for adversarial machine learning. *IEEE Transactions on Neural Networks and Learning Systems*, 28(11):2466–2478, 2016.
- [7] N. Carlini and D. Wagner. Towards evaluating the robustness of neural networks. In *IEEE Symposium on Security and Privacy*, pages 39–57. IEEE, 2017.
- [8] I. Chalkidis and D. Kampas. Deep learning in law: Early adaptation and legal word embeddings trained on large corpora. *Artificial Intelligence and Law*, 27(2):171–198, 2019.
- [9] G. Choquet. Theory of capacities. In *Annales de l’institut Fourier*, volume 5, pages 131–295, 1954.
- [10] J.M. Cohen, E. Rosenfeld, and J. Z. Kolter. Certified adversarial robustness via randomized smoothing. In *International Conference on Machine Learning*, 2019.
- [11] D. I. Diochnos, S. Mahloujifar, and M. Mahmoody. Adversarial risk and robustness: General definitions and implications for the uniform distribution. *Advances in Neural Information Processing Systems*, 31:10359–10368, 2018.
- [12] E. Dohmatob. Generalized no free lunch theorem for adversarial robustness. In *International Conference on Machine Learning*, pages 1646–1654. PMLR, 2019.
- [13] E. Dohmatob. Universal lower-bounds on classification error under adversarial attacks and random corruption. *arXiv preprint arXiv:2006.09989*, 2020.
- [14] R.M. Dudley. Distances of probability measures and random variables. In *Selected Works of RM Dudley*, pages 28–37. Springer, 2010.
- [15] P. Erdős and A. Stone. On the sum of two Borel sets. *Proceedings of the American Mathematical Society*, 25(2):304–306, 1970.
- [16] R. Gardner. The Brunn-Minkowski inequality. *Bulletin of the American Mathematical Society*, 39(3):355–405, 2002.
- [17] I. J. Goodfellow, J. Shlens, and C. Szegedy. Explaining and harnessing adversarial examples. *International Conference on Learning Representations*, 2015.
- [18] P. Gourdeau, V. Kanade, M. Kwiatkowska, and J. Worrell. On the hardness of robust classification. In *Advances in Neural Information Processing Systems*, volume 32, 2019.
- [19] H. Greenspan, B. van Ginneken, and R. M. Summers. Guest editorial deep learning in medical imaging: Overview and future promise of an exciting new technique. *IEEE Transactions on Medical Imaging*, 35(5):1153–1159, 2016.
- [20] S. Grigorescu, B. Trasnea, T. Cocias, and G. Macesanu. A survey of deep learning techniques for autonomous driving. *Journal of Field Robotics*, 37(3):362–386, 2020.
- [21] P.J. Huber and V. Strassen. Minimax tests and the Neyman-Pearson lemma for capacities. *The Annals of Statistics*, pages 251–263, 1973.

- [22] A. Jalal, A. Ilyas, C. Daskalakis, and A.G. Dimakis. The robust manifold defense: Adversarial training using generative models. *arXiv preprint arXiv:1712.09196*, 2017.
- [23] R.S.S. Kumar, D.R. O’Brien, K. Albert, and S. Vilojen. Law and adversarial machine learning. *NeurIPS Workshop on Security in Machine Learning*, 2018.
- [24] Z. Liu, J. Zhang, V. Jog, P. Loh, and A.B. McMillan. Robustifying deep networks for image segmentation. *arXiv preprint arXiv:1908.00656*, 2019.
- [25] H. Luiro, M. Parviainen, and E. Saksman. On the existence and uniqueness of  $p$ -harmonious functions. *Differential and Integral Equations*, 27(3/4):201 – 216, 2014.
- [26] X. Ma, Y. Niu, L. Gu, Y. Wang, Y. Zhao, J. Bailey, and F. Lu. Understanding adversarial attacks on deep learning based medical image analysis systems. *Pattern Recognition*, 110:107332, 2021.
- [27] A. Madry, A. Makelov, L. Schmidt, D. Tsipras, and A. Vladu. Towards deep learning models resistant to adversarial attacks. *International Conference on Learning Representations*, 2018.
- [28] S. Mahloujifar, D. I. Diochnos, and M. Mahmoody. The curse of concentration in robust learning: Evasion and poisoning attacks from concentration of measure. In *Proceedings of the AAAI Conference on Artificial Intelligence*, volume 33, pages 4536–4543, 2019.
- [29] J. Matousek and B. Gärtner. *Understanding and Using Linear Programming*. Springer Science & Business Media, 2007.
- [30] L. Meunier, M. Scetbon, R. Pinot, J. Atif, and Y. Chevaleyre. Mixed Nash equilibria in the adversarial examples game. *International Conference on Machine Learning*, 2021.
- [31] K. Muhammad, A. Ullah, J. Lloret, J. Del Ser, and V.H.C. de Albuquerque. Deep learning for safe autonomous driving: Current challenges and future directions. *IEEE Transactions on Intelligent Transportation Systems*, 2020.
- [32] N. Papernot, P. McDaniel, X. Wu, S. Jha, and A. Swami. Distillation as a defense to adversarial perturbations against deep neural networks. In *2016 IEEE Symposium on Security and Privacy*, pages 582–597. IEEE, 2016.
- [33] R. Pinot, R. Ettetdgui, G. Rizk, Y. Chevaleyre, and J. Atif. Randomization matters. how to defend against strong adversarial attacks. In *International Conference on Machine Learning*, pages 7717–7727. PMLR, 2020.
- [34] M. S. Pydi and V. Jog. Adversarial risk via optimal transport and optimal couplings. In *International Conference on Machine Learning*, pages 7814–7823. PMLR, 2020.
- [35] M. S. Pydi and V. Jog. Adversarial risk via optimal transport and optimal couplings. *IEEE Transactions on Information Theory*, 67(9):6031–6052, 2021.
- [36] G. Schay. Nearest random variables with given distributions. *The Annals of Probability*, pages 163–166, 1974.
- [37] U. Shaham, Y. Yamada, and S. Negahban. Understanding adversarial training: Increasing local stability of supervised models through robust optimization. *Neurocomputing*, 307:195–204, 2018.
- [38] W. Sierpiński. Sur la question de la mesurabilité de la base de M. Hamel. *Fundamenta Mathematicae*, 1(1):105–111, 1920.
- [39] A. Sinha, H. Namkoong, and J. C. Duchi. Certifying some distributional robustness with principled adversarial training. In *International Conference on Learning Representations*, 2017.
- [40] M. Staib and S. Jegelka. Distributionally robust deep learning as a generalization of adversarial training. In *NeurIPS workshop on Machine Learning and Computer Security*, 2017.
- [41] V. Strassen. The existence of probability measures with given marginals. *The Annals of Mathematical Statistics*, 36(2):423–439, 1965.

- [42] C. Szegedy, W. Zaremba, I. Sutskever, J. Bruna, D. Erhan, I. Goodfellow, and R. Fergus. Intriguing properties of neural networks. *International Conference on Learning Representations*, 2014.
- [43] N.G. Trillos and R. Murray. Adversarial classification: Necessary conditions and geometric flows. *arXiv preprint arXiv:2011.10797*, 2020.
- [44] Z. Tu, J. Zhang, and D. Tao. Theoretical analysis of adversarial learning: A minimax approach. In *Advances in Neural Information Processing Systems*, volume 32, 2019.
- [45] J. Uesato, B. Oadonoghue, P. Kohli, and A. Oord. Adversarial risk and the dangers of evaluating against weak attacks. In *International Conference on Machine Learning*, pages 5025–5034. PMLR, 2018.
- [46] C. Villani. *Topics in Optimal Transportation*. American Mathematical Society, 2003.
- [47] D. H. Wagner. Survey of measurable selection theorems. *SIAM Journal on Control and Optimization*, 15(5):859–903, 1977.
- [48] L. Yu. Asymptotics for strassen’s optimal transport problem. *arXiv preprint arXiv:1912.02051*, 2019.
- [49] L. Yu and V. Tan. Asymptotic coupling and its applications in information theory. *IEEE Transactions on Information Theory*, 65(3):1321–1344, 2018.
- [50] M.C. Yue, D. Kuhn, and W. Wiesemann. On linear optimization over Wasserstein balls. *Mathematical Programming*, pages 1–16, 2021.
- [51] L. Zajíček. On  $\sigma$ -porous sets in abstract spaces. In *Abstract and Applied Analysis*, volume 2005, pages 509–534. Hindawi, 2005.

## A Preliminary Lemmas

**Lemma A.1.** Let  $A_n \in \mathcal{B}(\mathcal{X})$  for  $n \in \{1, 2, \dots\}$ . Then,

$$\begin{aligned} (\cup_n A_n)^{\oplus \epsilon} &= \cup_n A_n^{\oplus \epsilon}, \\ (\cap_n A_n)^{\oplus \epsilon} &\subseteq \cap_n A_n^{\oplus \epsilon}. \end{aligned}$$

*Proof.* Suppose  $a \in (\cup_n A_n)^{\oplus \epsilon}$ . Then there exists  $a_i \in A_i$  for some  $i \in \{1, 2, \dots\}$  such that  $d(a, a_i) \leq \epsilon$ . Hence,  $a \in A_i^{\oplus \epsilon} \subseteq \cup_n A_n^{\oplus \epsilon}$ . Therefore,  $(\cup_n A_n)^{\oplus \epsilon} \subseteq \cup_n A_n^{\oplus \epsilon}$ .

Suppose  $b \in \cup_n A_n^{\oplus \epsilon}$ . Then  $b \in A_j^{\oplus \epsilon}$  for some  $j \in \mathbb{N}$ . So there must exist  $b' \in A_j$  such that  $d(b, b') \leq \epsilon$ . Since  $b' \in \cup_n A_n$ , we get that  $b \in (\cup_n A_n)^{\oplus \epsilon}$ . Therefore,  $\cup_n A_n^{\oplus \epsilon} \subseteq (\cup_n A_n)^{\oplus \epsilon}$ .

Suppose  $c \in (\cap_n A_n)^{\oplus \epsilon}$ . Then there exists  $c' \in \cap_n A_n$  such that  $d(c, c') \leq \epsilon$ . Since  $c' \in A_n$  for all  $n \in \{1, 2, \dots\}$ ,  $c \in A_n^{\oplus \epsilon}$  for all  $n \in \{1, 2, \dots\}$ . Hence,  $c \in \cap_n A_n^{\oplus \epsilon}$ . Therefore,  $(\cap_n A_n)^{\oplus \epsilon} \subseteq \cap_n A_n^{\oplus \epsilon}$ .  $\square$

**Lemma A.2.** Let  $A_n \in \mathcal{B}(\mathcal{X})$  for  $n \in \{1, 2, \dots\}$ . Then,

$$(\cup_n A_n)^{\oplus \epsilon} = \cup_n A_n^{\oplus \epsilon}.$$

*Proof.* Suppose  $a \in (\cup_n A_n)^{\oplus \epsilon}$ . Then there exists  $a_i \in A_i$  for some  $i \in \mathbb{N}$  such that  $d(a, a_i) \leq \epsilon$ . Hence,  $a \in A_i^{\oplus \epsilon} \subseteq \cup_n A_n^{\oplus \epsilon}$ . Therefore,  $(\cup_n A_n)^{\oplus \epsilon} = \cup_n A_n^{\oplus \epsilon}$ .

Suppose  $b \in \cup_n A_n^{\oplus \epsilon}$ . Then  $b \in A_j^{\oplus \epsilon}$  for some  $j \in \mathbb{N}$ . So there must exist  $b' \in A_j$  such that  $d(b, b') \leq \epsilon$ . Since  $b' \in \cup_n A_n$ , we get that  $b \in (\cup_n A_n)^{\oplus \epsilon}$ . Therefore,  $\cup_n A_n^{\oplus \epsilon} \subseteq (\cup_n A_n)^{\oplus \epsilon}$ .  $\square$

**Lemma A.3.** Let  $(F_n)$  be a sequence of closed sets in  $\mathcal{X}$  such that  $F_k \supseteq F_{k+1}$  for  $k \in \mathcal{N}$ . Then,

$$(\cap_n F_n)^{\oplus \epsilon} = \cap_n F_n^{\oplus \epsilon}.$$

*Proof.* Suppose  $x \in (\bigcap_n F_n)^{\oplus \epsilon}$ . Then there exists  $x' \in \bigcap_n F_n$  such that  $d(x, x') \leq \epsilon$ . Since  $x' \in F_n$  for all  $n \in \mathbb{N}$ ,  $x \in F_n^{\oplus \epsilon}$  for all  $n \in \mathbb{N}$ . Hence,  $x \in \bigcap_n F_n^{\oplus \epsilon}$  and therefore  $(\bigcap_n F_n)^{\oplus \epsilon} \subseteq \bigcap_n F_n^{\oplus \epsilon}$ . We will now show the set inclusion in the opposite direction.

Let  $x \in \bigcap_n F_n^{\oplus \epsilon}$ . Then  $x \in F_n^{\oplus \epsilon}$  for all  $n \in \mathbb{N}$ . Hence, there exists  $x_n \in F_n$  such that  $d(x, x_n) \leq \epsilon$  for all  $n \in \mathbb{N}$ . Since  $(x_n)$  is a bounded sequence, it has a subsequence  $(x_{n_k})$  that converges to some  $x^*$ . We claim that  $x^* \in F := \bigcap_n F_n$ . Indeed, for any  $m \in \mathbb{N}$ , the tail of the subsequence  $(x_{n_k})$  with indices greater than  $m$  is contained in  $F_m$ . Since  $F_m$  is closed,  $x^*$  must be in  $F_m$ . Since the choice of  $m$  was arbitrary,  $x^* \in \bigcap_m F_m = F$ . Hence,  $x \in F^{\oplus \epsilon}$  because  $d(x, x^*) \leq \epsilon$ . Therefore,  $\bigcap_n F_n^{\oplus \epsilon} \subseteq F^{\oplus \epsilon}$ .  $\square$

**Lemma A.4.** Let  $A \in \mathcal{B}(\mathcal{X})$ . Let  $(\gamma_n)_{n=1}^{\infty}$  be a non-negative, monotonically decreasing sequence converging to 0. Let  $\bar{A}$  denote the closure of  $A$  in  $\mathcal{X}$ . Then,  $A^{\gamma_n} \downarrow \bar{A}$ .

*Proof.* We know  $\bar{A} \subseteq \bar{A}^{\gamma_n} = A^{\gamma_n}$  for all  $n$ . Hence  $\bar{A} \subseteq \lim_{n \rightarrow \infty} \bigcap_{k=1}^n A^{\gamma_k}$ .

Suppose  $x \in \lim_{n \rightarrow \infty} \bigcap_{k=1}^n A^{\gamma_k}$ . Then it must be that  $d(x, \bar{A}) = 0$  because otherwise  $x$  would not lie in  $A^{\gamma_n}$  for all large enough  $n$ . Since  $d(x, \bar{A}) = 0$ , we can find a sequence of points in  $\bar{A}$  that tend to  $x$ . But since  $\bar{A}$  is closed, we must have  $x \in \bar{A}$ . Hence,  $\lim_{n \rightarrow \infty} \bigcap_{k=1}^n A^{\gamma_k} \subseteq \bar{A}$ .  $\square$

**Lemma A.5.** Let  $\epsilon_1 > \epsilon_2 > 0$  and  $A \in \mathcal{B}(\mathcal{X})$ . Then for any  $\delta \in (0, \epsilon_1 - \epsilon_2)$ ,  $A^{\epsilon_1 - \epsilon_2 - \delta} \subseteq (A^{\epsilon_1})^{-\epsilon_2}$ .

*Proof.* Recall that for  $\epsilon > 0$ ,  $A^{-\epsilon} = ((A^\epsilon)^c)^c$ . From the definition,  $x \in A^{-\epsilon}$  if and only if  $d(x, A^\epsilon) > \epsilon$ .

Let  $\delta \in (0, \epsilon_1 - \epsilon_2)$  and  $x \in A^{\epsilon_1 - \epsilon_2 - \delta}$ . Then,  $d(x, A) \leq \epsilon_1 - \epsilon_2 - \delta$ . Consider any  $y \in (A^{\epsilon_1})^c$ . Then,  $d(y, A) > \epsilon_1$ . By the reverse triangle inequality,

$$d(x, y) \geq d(y, A) - d(x, A) > \epsilon_1 - (\epsilon_1 - \epsilon_2 - \delta) = \epsilon_2 + \delta.$$

Hence,

$$d(x, (A^{\epsilon_1})^c) = \inf_{y \in (A^{\epsilon_1})^c} d(x, y) \geq \epsilon_2 + \delta > \epsilon_2.$$

Therefore,  $x \in (A^{\epsilon_1})^{-\epsilon_2}$ .  $\square$

**Lemma A.6.** Let  $A \in \mathcal{B}(\mathcal{X})$ . Then,  $\mathbb{1}\{x \in A^{\oplus \epsilon}\} = \sup_{x' \in B_\epsilon(x)} \mathbb{1}\{x' \in A\}$ .

*Proof.* Suppose  $x \in A^{\oplus \epsilon}$ . Then there exists  $x' \in A$  such that  $x' \in B_\epsilon(x)$ . Hence,  $\sup_{x' \in B_\epsilon(x)} \mathbb{1}\{x' \in A\} = 1$ .

Suppose  $x \in \mathcal{X}$  is such that  $\sup_{x' \in B_\epsilon(x)} \mathbb{1}\{x' \in A\} = 1$ . Then there is a sequence  $(x_n)_{n=1}^{\infty}$  such that  $d(x, x_n) \leq \epsilon$  and  $x_n \in A$  for all  $n$ . Since  $(x_n)$  is a bounded sequence in a closed set,  $B_\epsilon(x)$ , it has a subsequence that converges to some  $x^*$  such that  $d(x, x^*) \leq \epsilon$  and  $x^* \in A$ . Hence,  $x \in B_\epsilon(x^*) \subseteq A^{\oplus \epsilon}$ .  $\square$

## B Proofs from Section 4

*Proof of Lemma 4.1.* We prove the above statement by using a counterexample motivated from Example 2.4 in [25]. For any  $\epsilon > 0$ , there exists a Borel measurable set  $S \subseteq [-\epsilon, \epsilon]^2$  such that its projection onto the first coordinate is not Borel measurable ([25], Theorem 6.7.2 and Theorem 6.7.11 in [4]). That is,  $S \in \mathcal{B}(\mathbb{R}^2)$  but  $S_1 := \{x_1 \in \mathbb{R} : (x_1, x_2) \in S\} \notin \mathcal{B}(\mathbb{R})$ .

Define a homeomorphism  $\phi : \mathbb{R}^3 \rightarrow \mathbb{R}^3$  as  $\phi(x_1, x_2, x_3) := (x_1, x_2, \sqrt{\epsilon^2 - x_2^2})$ .  $\phi$  maps the plane  $[-\epsilon, \epsilon]^2 \times \{0\}$  onto the half-cylinder,  $\{(x_1, x_2, x_3) \in \mathbb{R}^3 : x_1 \in [-\epsilon, \epsilon], x_2^2 + x_3^2 = \epsilon^2, x_3 \geq 0\}$ , of radius  $\epsilon$ . Let  $A := \phi(S \times \{0\})$ . Then  $A \in \mathcal{B}(\mathbb{R}^3)$  because  $S \times \{0\} \in \mathcal{B}(\mathbb{R}^3)$ . We have the following equality.

$$A^{\oplus \epsilon} \cap (\mathbb{R} \times \{0\}^2) = S_1 \times \{0\}^2$$

Suppose  $A^{\oplus \epsilon} \in \mathcal{B}(\mathbb{R}^3)$ . Then the above equality implies that  $S_1 \in \mathcal{B}(\mathbb{R})$  contradicting our choice of  $S$ . Hence,  $A^{\oplus \epsilon} \notin \mathcal{B}(\mathbb{R}^3)$ .  $\square$

*Proof of Lemma 4.2.* Recall that an analytic set is a continuous image of a Borel set in a Polish space. Although an analytic set need not be Borel measurable, it is always universally measurable, i.e., measurable with respect to any measure defined on a complete measure space [1].

We will now show that if  $A \in \mathcal{B}(\mathcal{X})$ , then  $A^{\oplus\epsilon}$  is an analytic set, thus showing that it is measurable in the complete measure space  $(\mathcal{X}, \overline{\mathcal{B}}(\mathcal{X}))$ .

Define  $D = \{(x, x') \in \mathcal{X}^2 : d(x, x') \leq \epsilon\}$ .  $D$  is Borel measurable because it is the preimage of the Borel set  $(-\infty, \epsilon]$  under the Borel measurable function  $d$ . Define  $f : D \rightarrow \mathbb{R}$  as  $f(x, x') = -\mathbb{1}\{x' \in A\}$ . For  $c \in \mathbb{R}$ , we have the following.

$$\{(x, x') \in \mathcal{X}^2 : f(x, x') < c\} = \begin{cases} \emptyset & c \leq -1, \\ (\mathcal{X} \times A) \cap D & c \in (-1, 0], \\ \mathcal{X}^2 & c > 0. \end{cases}$$

Since  $A \in \mathcal{B}(\mathcal{X})$  and  $D \in \mathcal{B}(\mathcal{X}^2)$ ,  $(\mathcal{X} \times A) \cap D \in \mathcal{B}(\mathcal{X}^2)$ . Hence, by Definition 7.21 in [1],  $f$  is a lower semianalytic function. By Proposition 7.47 in [1], the function  $f^* : \mathcal{X} \rightarrow \mathbb{R}$  defined as  $f^*(x) := \inf_{x' \in B_\epsilon(x)} f(x, x')$  is lower semianalytic. By Lemma A.6, we have

$$f^*(x) = \inf_{x' \in B_\epsilon(x)} -\mathbb{1}\{x' \in A\} = - \sup_{x' \in B_\epsilon(x)} \mathbb{1}\{x' \in A\} = -\mathbb{1}\{x \in A^{\oplus\epsilon}\}.$$

By Definition 7.21 in [1], it follows that  $A^{\oplus\epsilon}$  is an analytic set. By Corollary 7.42.1 in [1],  $A^{\oplus\epsilon} \in \overline{\mathcal{B}}(\mathcal{X})$ . □

*Proof of Lemma 4.3.* Let  $\beta = 1/4$ . Take any  $e \in E$ . Since  $E = A^\epsilon \setminus A^\epsilon$ , we have the following two implications: 1)  $E \subseteq A^\epsilon$  which implies that  $d(e, A) \leq \epsilon$ , and 2)  $E \cap A^\epsilon = \emptyset$  which implies that  $d(e, A) > \epsilon$ . Combining the two implications, we get that  $d(e, A) = \epsilon$ . Hence, for every  $r \in (0, \epsilon]$ , there must exist an  $a_r \in A$  such that  $\epsilon \leq \|e - a_r\| < \epsilon + r/4$ . We pick an  $x' \in \mathcal{X}$  on the line segment joining  $a_r$  and  $x$  as follows.

$$t := \frac{r}{2\|e - a_r\|},$$

$$x' := ta_r + (1-t)x.$$

Since  $\|x - a_r\| \in [\epsilon, \epsilon + r/4]$  and  $r \in (0, \epsilon]$ , it is clear that  $t \in (0, 1/2)$ . From the definition of  $x'$ , it follows that  $\|x' - e\| = t\|e - a_r\| = r/2$ . We will now show that  $B_{\beta r}(x') \subseteq B_r(e) \setminus E$ . For any  $y \in B_{\beta r}(x')$ , we have the following.

$$\|y - e\| \leq \|y - x'\| + \|x' - e\| \leq \beta r + r/2 < r.$$

Hence,  $y \in B_r(e)$ . Moreover,

$$\|y - a_r\| \leq \|y - x'\| + \|x' - a_r\| \leq \beta r + (\|e - a_r\| - r/2) < \epsilon.$$

Hence,  $y \in A^\epsilon$  and so  $y \notin E$ . Therefore,  $B_{\alpha r}(x') \subseteq B_r(e) \setminus E$ . Hence, we have the following property (call it  $(*)$ ): For any  $e \in E$  and any  $r \in (0, \epsilon]$ , there is an  $x' \in \mathcal{X}$  such that  $B_{\beta r}(x') \subseteq B_r(e) \setminus E$ .

Let  $\alpha = \beta(1 - \beta)$ . Take any  $x \in \mathcal{X}$  and  $r \in (0, \epsilon]$ . We will now show that there exists  $x' \in \mathcal{X}$  such that  $B_{\alpha r}(x') \subseteq B_r(x) \setminus E$ .

Suppose  $x \in E$ . Then by the property  $(*)$ , there exists  $x' \in \mathcal{X}$  such that  $B_{\alpha r}(x') \subseteq B_{\beta r}(x') \subseteq B_r(x) \setminus E$ . Suppose on the other hand  $x \notin E$ . If  $B_{\beta r}(x) \cap E = \emptyset$ , then choosing  $x' = x$  we have  $B_{\alpha r}(x') \subseteq B_{\beta r}(x') \subseteq B_r(x) \setminus E$ . If not, then there exists  $e \in B_{\beta r}(x) \cap E$ . We claim that  $B_{(1-\beta)r}(e) \subseteq B_{\beta r}(x)$ . Indeed, for any  $y \in B_{(1-\beta)r}(e)$  we have

$$\|y - x\| \leq \|y - e\| + \|e - x\| \leq (1 - \beta)r + \beta r = r.$$

Since  $(1 - \beta)r \in (0, \epsilon]$ , by the property  $(*)$ , there exists  $x' \in \mathcal{X}$  such that  $B_{\alpha r}(x') = B_{\beta(1-\beta)r}(x') \subseteq B_{(1-\beta)r}(x) \setminus E \subseteq B_r(x) \setminus E$ . □

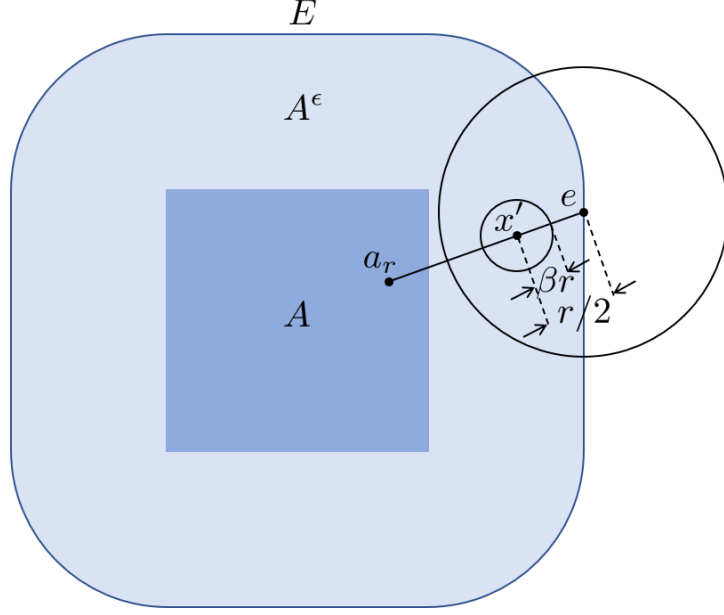

Figure 2: Choice of  $x' \in \mathcal{X}$  and  $\alpha \in (0, 1)$  such that  $B_{\alpha r}(x') \subseteq B_r(x) \setminus E$  when  $x \in E$ .

*Proof of Theorem 4.2.* By Lemma 4.3  $A^c \setminus A^\epsilon$  is porous, and so  $\lambda(A^c \setminus A^\epsilon) = 0$ . Hence,  $\lambda(A^\epsilon) = \lambda(A^c)$ . Using the fact that  $A^\epsilon \subseteq A^{\oplus \epsilon} \subseteq A^c$ , we have  $A^{\oplus \epsilon} \setminus A^\epsilon \subseteq A^c \setminus A^\epsilon$ . Hence,  $\lambda(A^{\oplus \epsilon} \setminus A^\epsilon) = 0$ . Therefore,  $A^{\oplus \epsilon} \in \mathcal{L}(\mathcal{X})$  and  $\lambda(A^{\oplus \epsilon}) = \lambda(A^c) = \lambda(A^\epsilon)$ .

Since  $A^{\oplus \epsilon}, (A^c)^{\oplus \epsilon} \in \mathcal{L}(\mathcal{X})$ ,  $R_{\oplus \epsilon}(\ell_{0/1}, A)$  is well-defined. If  $p_0$  and  $p_1$  are absolutely continuous with respect to the Lebesgue measure, the equation  $R_{\oplus \epsilon}(\ell_{0/1}, A) = R_\epsilon(\ell_{0/1}, A)$  follows from the previous conclusion that  $\lambda(A^{\oplus \epsilon}) = \lambda(A^c)$ .  $\square$

## C Proofs from Section 5

### C.1 Proofs from Section 5.1

*Proof of Lemma 5.1.* Let  $\mu' \in \mathcal{P}(\mathcal{X})$  be such that  $W_\infty(\mu, \mu') \leq \epsilon$ . Then there exists a coupling  $\lambda \in \Pi(\mu', \mu)$  such that for  $(x, x') \sim \lambda$ ,  $d(x, x') \leq \epsilon$   $\lambda$ -a.e. Hence,

$$\mu'(A) = \lambda(A \times \mathcal{X}) = \lambda(A \times A^{\oplus \epsilon}) \leq \lambda(\mathcal{X} \times A^{\oplus \epsilon}) = \mu(A^{\oplus \epsilon}).$$

Since the choice of  $\mu'$  was arbitrary in the set  $\{\nu \in \mathcal{P}(\mathcal{X}) : W_\infty(\mu, \nu) \leq \epsilon\}$ , we have,

$$\sup_{W_\infty(\mu, \mu') \leq \epsilon} \mu'(A) \leq \mu(A^{\oplus \epsilon}).$$

Now we show the inequality in the opposite direction. Like in the proof of Lemma 4.2, consider the function  $f : D \rightarrow \mathbb{R}$  defined as  $f(x, x') = -\mathbb{1}\{x' \in A\}$ , where  $D = \{(x, x') \in \mathcal{X}^2 : d(x, x') \leq \epsilon\}$ . Define  $f^* : \mathcal{X} \rightarrow \mathbb{R}$  as  $f^*(x) := \inf_{x' \in B_\epsilon(x)} f(x, x')$ . As shown in the proof of Lemma 4.2,  $f^*(x) = -\mathbb{1}\{x \in A^{\oplus \epsilon}\}$ . By Proposition 7.50(a) in [1], there exists a universally measurable function  $\phi : \mathcal{X} \rightarrow \mathcal{X}$  such that  $|f^*(x) - f(x, \phi(x))| < \delta$  for any  $\delta > 0$ . Since  $f$  and  $f^*$  are both 0-1 valued functions, we get  $f^*(x) = f(x, \phi(x))$  for all  $x \in \mathcal{X}$  by choosing  $\delta = 1/2$ . Moreover, by Proposition 7.50(a) in [1],  $Gr(\phi) \subseteq D$  i.e.,  $d(x, \phi(x)) \leq \epsilon$  for all  $x \in \mathcal{X}$ . Therefore,

$$\sup_{W_\infty(\mu, \mu') \leq \epsilon} \mu'(A) \geq \phi_{\#} \mu(A) = \mu(\phi^{-1}(A)) = \mu(A^{\oplus \epsilon}).$$

Hence,  $\sup_{W_\infty(\mu, \mu') \leq \epsilon} \mu'(A) = \phi_{\#} \mu(A) = \mu(A^{\oplus \epsilon})$  for any set  $A \in \mathcal{B}(\mathcal{X})$ .  $\square$

*Proof of Theorem 5.1.* Since  $A \in \mathcal{B}(\mathcal{X})$ ,  $A^c \in \mathcal{B}(\mathcal{X})$  and by Lemma 4.2,  $A^{\oplus \epsilon}, (A^c)^{\oplus \epsilon} \in \overline{\mathcal{B}}(\mathcal{X})$ . Therefore  $R_{\oplus \epsilon}(\ell_{0/1}, A)$  is well-defined.



By Lemma 5.1, we have

$$\begin{aligned}
R_{\Gamma_\epsilon}(\ell_{0/1}, A) &= \sup_{\substack{W_\infty(p_0, p'_0) \leq \epsilon \\ W_\infty(p_1, p'_1) \leq \epsilon}} \frac{T}{T+1} p'_0(A) + \frac{1}{T+1} p'_1((A^c)) \\
&= \frac{T}{T+1} \left( \sup_{W_\infty(p_0, p'_0) \leq \epsilon} p'_0(A) \right) + \frac{1}{T+1} \left( \sup_{W_\infty(p_1, p'_1) \leq \epsilon} p'_1((A^c)) \right) \\
&= \frac{T}{T+1} p_0(A^{\oplus \epsilon}) + \frac{1}{T+1} p_1((A^c)^{\oplus \epsilon}) \\
&= R_{\oplus \epsilon}(\ell_{0/1}, A)
\end{aligned}$$

By Lemma 5.1 again, the supremum over  $p'_0$  and  $p'_1$  in  $R_{\Gamma_\epsilon}(\ell_{0/1}, A)$  is attained by measures pushed forward from  $p_0$  and  $p_1$  via some measurable maps  $f_0$  and  $f_1$ . From this, the remaining assertions of the theorem follow.  $\square$

## C.2 Proofs from Section 5.2

*Proof of Lemma 5.2.* The following properties of  $v$  are trivially true:  $v(\phi) = 0$ ,  $v(\mathcal{X}) = 1$  and  $v(A) \leq v(B)$  for  $A \subseteq B$ .

Consider a sequence of sets  $(A_n)$  in  $\mathcal{X}$  such that  $A_k \subseteq A_{k+1}$  for  $k \in \mathbb{N}$ . Let  $A = \cup_n A_n$ . That is,  $A_n \uparrow A$ . Then by Lemma A.1 we have,  $A^{\oplus \epsilon} = \cup_n A_n^{\oplus \epsilon}$ . Hence,  $A_n^{\oplus \epsilon} \uparrow A^{\oplus \epsilon}$  and by the continuity of measure,  $v(A_n) = \mu(A_n^{\oplus \epsilon}) \uparrow \mu(A^{\oplus \epsilon}) = v(A)$ .

Consider a sequence of closed sets  $(F_n)$  in  $\mathcal{X}$  such that  $F_k \supseteq F_{k+1}$  for  $k \in \mathbb{N}$ . Let  $F = \cap_n F_n$ . That is,  $F_n \downarrow F$ . By Lemma A.3,  $F_n^{\oplus \epsilon} \downarrow F^{\oplus \epsilon}$ . Hence, by the continuity of measure, we have  $v(F_n) = \mu(F_n^{\oplus \epsilon}) \downarrow \mu(F^{\oplus \epsilon}) = v(F)$ .

For any two sets  $A, B \in \mathcal{L}(\mathcal{X})$ ,

$$\begin{aligned}
v(A \cup B) &= \mu((A \cup B)^{\oplus \epsilon}) \\
&\stackrel{(i)}{=} \mu(A^{\oplus \epsilon} \cup B^{\oplus \epsilon}) \\
&= \mu(A^{\oplus \epsilon}) + \mu(B^{\oplus \epsilon}) - \mu(A^{\oplus \epsilon} \cap B^{\oplus \epsilon}) \\
&\stackrel{(ii)}{\leq} \mu(A^{\oplus \epsilon}) + \mu(B^{\oplus \epsilon}) - \mu((A \cap B)^{\oplus \epsilon}) \\
&= v(A) + v(B) - v(A \cap B),
\end{aligned}$$

where (i) follows from Lemma A.1 and (ii) follows from Lemma A.2. Hence,  $v$  is a 2-alternating capacity.  $\square$

*Proof of Lemma 5.3.* Let  $\mu' \in \mathcal{P}(\mathcal{X})$  be such that  $W_\infty(\mu, \mu') \leq \epsilon$ . Then there exists a coupling  $\gamma \in \Pi(\mu', \mu)$  such that for  $(x, x') \sim \gamma$ ,  $d(x, x') \leq \epsilon$   $\gamma$ -a.e. Hence,

$$\mu'(A) = \gamma(A \times \mathcal{X}) = \gamma(A \times A^{\oplus \epsilon}) \leq \gamma(\mathcal{X} \times A^{\oplus \epsilon}) = \mu(A^{\oplus \epsilon}).$$

Since the choice of  $\mu'$  was arbitrary in the set  $\{\nu \in \mathcal{P}(\mathcal{X}) : W_\infty(\mu, \nu) \leq \epsilon\}$ , we have,

$$\sup_{W_\infty(\mu, \mu') \leq \epsilon} \mu'(A) \leq \mu(A^{\oplus \epsilon}).$$

We will now show the inequality in the reverse direction. By Lemma 5.2,  $A \mapsto \mu(A^{\oplus \epsilon})$  is a 2-alternating capacity. Hence by Lemma 2.5 in [21], for any Lebesgue measurable  $A \subseteq \mathcal{X}$ , there exists a  $\nu \in \mathcal{P}(\mathcal{X})$  such that  $\nu(A) = \mu(A^{\oplus \epsilon})$  and  $\nu(B) \leq \mu(B^{\oplus \epsilon})$  for all Lebesgue measurable  $B \subseteq \mathcal{X}$ . For such a  $\nu$ , it is clear that  $W_\infty(\mu, \nu) \leq \epsilon$ . Hence,

$$\sup_{W_\infty(\mu, \mu') \leq \epsilon} \mu'(A) \geq \nu(A) = \mu(A^{\oplus \epsilon}).$$

Hence,  $\sup_{W_\infty(\mu, \mu') \leq \epsilon} \mu'(A) = \nu(A) = \mu(A^{\oplus \epsilon})$ .  $\square$

*Proof of Theorem 5.2.*

$$\begin{aligned}
R_{\Gamma_\epsilon}(\ell_{0/1}, A) &= \frac{T}{T+1} \left( \sup_{W_\infty(p_0, p'_0) \leq \epsilon} p'_0(A) \right) + \frac{1}{T+1} \left( \sup_{W_\infty(p_1, p'_1) \leq \epsilon} p'_1((A^c)) \right) \\
&\stackrel{(*)}{=} \frac{T}{T+1} p_0(A^{\oplus \epsilon}) + \frac{1}{T+1} p_1((A^c)^{\oplus \epsilon}) \\
&= R_{\oplus \epsilon}(\ell_{0/1}, A),
\end{aligned}$$

where  $(*)$  follows from Lemma 5.3. By Lemma 5.3 again, the supremum over  $p'_0$  and  $p'_1$  in  $R_{\Gamma_\epsilon}(\ell_{0/1}, A)$  is attained.  $\square$

## D Proofs from Section 6

We first prove a discrete version of Theorem 6.1 on a finite space.

**Lemma D.1.** Let  $\mathcal{X}_n = \{x_1, \dots, x_n\} \subseteq \mathcal{X}$ . Let  $\mathbf{p} = (p_i)_{i=1}^n, \mathbf{q} = (q_i)_{i=1}^n$  be such that  $p_i, q_i \geq 0$  for  $i \in [n]$  and  $\sum_i p_i \leq \sum_i q_i$ . Let  $\epsilon > 0$ . For  $A \subseteq \mathcal{X}_n$ , let  $A^\epsilon := \{x \in \mathcal{X}_n : d(x, x') \leq \epsilon, \text{ for some } x' \in A\}$ . For  $A \subseteq \mathcal{X}_n$ , let  $\mathbf{p}(A) = \sum_{i: x_i \in A} p_i$  and  $\mathbf{q}(A) = \sum_{i: x_i \in A} q_i$ . For  $i, j \in [n]$ , let  $c_{ij} = \mathbb{1}\{d(x_i, x_j) > 2\epsilon\}$ . Then,

$$\max_{A \subseteq \mathcal{X}_n} \mathbf{p}(A) - \mathbf{q}(A^{2\epsilon}) = \min_{\substack{x_{ij} \geq 0 \\ \sum_j x_{ij} = p_i \\ \sum_i x_{ij} \leq q_j}} \sum_{i,j} c_{ij} x_{ij}. \quad (16)$$

*Proof.* For  $i, j \in [n]$ , define  $d_{ij} := 1 - c_{ij}$ . Then,

$$\min_{\substack{x_{ij} \geq 0 \\ \sum_j x_{ij} = p_i \\ \sum_i x_{ij} \leq q_j}} \sum_{i,j} c_{ij} x_{ij} = \sum_i p_i - \max_{\substack{x_{ij} \geq 0 \\ \sum_j x_{ij} = p_i \\ \sum_i x_{ij} \leq q_j}} \sum_{i,j} d_{ij} x_{ij} \quad (17)$$

Consider the following modification to the linear program on the right hand side of (17), where the constraint  $\sum_j x_{ij} = p_i$  is replaced by  $\sum_j x_{ij} \leq p_i$ .

$$\max_{\substack{x_{ij} \geq 0 \\ \sum_j x_{ij} \leq p_i \\ \sum_i x_{ij} \leq q_j}} \sum_{i,j} d_{ij} x_{ij}. \quad (18)$$

We will show that the above linear program is equivalent to the linear program on the right hand side of (17). Since the above linear program is bounded and feasible, it admits a solution. Let  $\{x_{ij}^*\}_{i,j \in [n]}$  be the solution to (18). Suppose there exists  $m \in [n]$  such that  $\sum_j x_{mj}^* < p_m$ . Let  $s = p_m - (\sum_j x_{mj}^*) > 0$ . For  $j \in [n]$ , define  $s_j := q_j - \sum_i x_{ij}^*$ . Then,

$$\begin{aligned}
\sum_j s_j &= \sum_j q_j - \sum_{i,j} x_{ij} \\
&\geq \sum_i p_i - \left( \left( \sum_{i \neq m} p_i \right) + p_m - s \right) \\
&= s.
\end{aligned}$$

Therefore,  $\sum_j s_j \geq s$ . Let  $k$  be the largest integer for which  $\sum_{j=1}^k s_j < s$ . Define,

$$y_{ij} = \begin{cases} x_{ij}^* & i \neq m, \\ x_{mj}^* + s_j & i = m, j \leq k, \\ x_{mk}^* + s - \sum_{j=1}^k s_j & i = m, j = k+1, \\ x_{mj}^* & i = m, j \geq k+1. \end{cases} \quad (19)$$

By the above definition we have,

$$\sum_j y_{ij} = \begin{cases} \sum_j x_{ij}^* & i \neq m, \\ \sum_j x_{ij}^* + s & i = m. \end{cases}$$

$$\sum_i y_{ij} = \begin{cases} \sum_i x_{mj}^* + s_j & j \leq k, \\ \sum_i x_{mk}^* + s - \sum_{j=1}^k s_j & j = k+1, \\ \sum_i x_{mj}^* & j \geq k+1. \end{cases}$$

Combining the above with the definitions of  $k, s$  and  $\{s_j\}_{j \in [n]}$ , we see that  $\sum_j y_{ij} \leq p_i$  and  $\sum_i y_{ij} \leq q_j$ . Moreover,  $y_{ij} \geq x_{ij}$  for all  $i, j \in [n]$ . Hence,  $\sum_{ij} d_{ij} y_{ij} \geq \sum_{ij} d_{ij} x_{ij}$ . Therefore, any solution  $\{x_{ij}^*\}_{i,j \in [n]}$  for which there exists  $m \in [n]$  such that  $\sum_j x_{mj}^* < p_m$ , can be improved to a solution  $\{y_{ij}\}_{i,j \in [n]}$  for which  $\sum_j y_{mj} = p_m$ . Hence,

$$\max_{\substack{x_{ij} \geq 0 \\ \sum_j x_{ij} = p_i \\ \sum_i x_{ij} \leq q_j}} \sum_{i,j} d_{ij} x_{ij} = \max_{\substack{x_{ij} \geq 0 \\ \sum_j x_{ij} \leq p_i \\ \sum_i x_{ij} \leq q_j}} \sum_{i,j} d_{ij} x_{ij}. \quad (20)$$

Since the maximization in (20) is a linear program in canonical form, we employ the strong duality theorem (for a reference, see Chapter 6 in [29]) to get the following.

$$\max_{\substack{x_{ij} \geq 0 \\ \sum_j x_{ij} \leq p_i \\ \sum_i x_{ij} \leq q_j}} \sum_{i,j} d_{ij} x_{ij} = \min_{\substack{u_i, v_i \geq 0 \\ u_i + v_j \geq d_{ij}}} \sum_i (p_i u_i + q_i v_i). \quad (21)$$

Since  $d_{ij} \in \{0, 1\}$ , we may assume  $u_i, v_i \leq 1$  for the minimization in (21) without violating other constraints because any decrease of  $u_i, v_i$  down to 1 will only decrease the value of  $\sum_i (p_i u_i + q_i v_i)$ , which we seek to minimize. Defining  $w_i := 1 - u_i$ , we have the following from (17) and (21).

$$\min_{\substack{x_{ij} \geq 0 \\ \sum_j x_{ij} = p_i \\ \sum_i x_{ij} \leq q_j}} \sum_{i,j} c_{ij} x_{ij} = \max_{\substack{w_i, v_i \in [0,1] \\ w_i - v_j \leq c_{ij}}} \sum_i (p_i w_i - q_i v_i). \quad (22)$$

The optimal  $w_i^*, v_i^*$  that achieve the maximum in (22) must lie at one of the vertices of the polyhedron supported by the hyperplanes,  $w_i = 0, w_i = 1, v_i = 0, v_i = 1$  and  $w_i - v_j = c_{ij}$ . Hence,  $w_i^*, v_i^* \in \{0, 1\}$ . Moreover if  $c_{ij} = 0$  and  $w_i^* = 1$  for some  $i, j \in [n]$ , then  $v_j^* = 1$ . On the other hand if  $c_{ij} = 1$ , then  $v_j^*$  can be set to 0 without violating other constraints and without decreasing the maximization objective. Therefore, setting  $A := \{x_i \in \mathcal{X}_n : w_i^* = 1\}$ , we see that the maximum in (22) equals the maximum in (16).  $\square$

*Proof of Theorem 6.1.* Let  $(\gamma_n)_{n=1}^\infty$  be a non-negative, monotonically decreasing sequence converging to 0. Let  $(x_n)_{n=1}^\infty$  be a dense sequence in  $\mathcal{X}$ . Define a function  $f : \mathcal{X} \rightarrow \{x_n\}_{n=1}^\infty$  such that  $f(x) = x_k$  for the least integer  $k$  with  $d(x, x_k) < \gamma_n$ . Let  $H_n = \{x_1, \dots, x_n\}$ . Let  $s_n$  be the least positive integer such that,

$$\mu(f^{-1}(H_{s_n-1})) > \mu(\mathcal{X}) - \gamma_n, \quad (23)$$

$$\nu(f^{-1}(H_{s_n-1})) > \nu(\mathcal{X}) - \gamma_n. \quad (24)$$

Given  $n$ , construct a discrete measure  $\mu_n$  supported on the finite set  $H_{s_n}$  such that  $\mu_n(x_k) := \mu(f^{-1}(x_k))$  for  $k \in [s_n - 1]$  and  $\mu_n(\mathcal{X}) = \mu(\mathcal{X})$ . Similarly, construct  $\nu_n$  supported on  $H_{s_n}$  such that  $\nu_n(x_k) := \nu(f^{-1}(x_k))$  for  $k \in [s_n - 1]$  and  $\nu_n(\mathcal{X}) = \nu(\mathcal{X})$ .

Let  $A \in \mathcal{B}(\mathcal{X})$ . We have,

$$\begin{aligned} \mu_n(A) &\stackrel{(i)}{=} \mu_n(A \cap H_{s_n}) \\ &\stackrel{(ii)}{<} \mu_n(A \cap H_{s_n-1}) + \gamma_n \\ &\stackrel{(iii)}{=} \mu(f^{-1}(A \cap H_{s_n-1})) + \gamma_n \\ &\stackrel{(iv)}{\leq} \mu(A^{\gamma_n}) + \gamma_n, \end{aligned} \quad (25)$$

where (i) follows from the fact that  $\mu_n$  is supported on  $H_{s_n}$ , (ii) follows from (23), (iii) follows from the definition of  $\mu_n$  and (iv) follows because of the following: For any  $y \in A \cap H_{s_n-1}$ ,  $f^{-1}(y) \subseteq \{x \in \mathcal{X} : d(x, y) < \gamma_n\} \subseteq A^{\gamma_n}$ . Hence,  $f^{-1}(A \cap H_{s_n-1}) \subseteq A^{\gamma_n}$ . Applying (25), with  $A^c$  instead of  $A$ , we have the following.

$$\mu(A^{-\gamma_n}) - \gamma_n \leq \mu_n(A) \leq \mu(A^{\gamma_n}) + \gamma_n. \quad (26)$$

Letting  $n \rightarrow \infty$  in (26) and using Lemma A.4, we get that  $\limsup_n \mu_n(A) \leq \mu(A)$  for all closed subsets  $A$  of  $\mathcal{X}$ . Hence, by applying the Portmanteau theorem (Theorem 2.1 in [3]), we conclude that the sequence of measures  $(\mu_n)_{n=1}^\infty$  converges weakly to  $\mu$ . Similarly,  $\nu_n \rightarrow \nu$  weakly.

For any fixed  $n$ , we apply Lemma D.1 to the measures  $\mu_n, \nu_n$  on the finite space  $H_{s_n}$  to get the following.

$$\max_{A \subseteq H_{s_n}} \mu_n(A) - \nu_n(A^{2\epsilon+4\gamma_n}) = \min_{\substack{x_{ij} \geq 0 \\ \sum_j x_{ij} = \mu_n(x_i) \\ \sum_i x_{ij} \leq \nu_n(x_j)}} \sum_{i,j} x_{ij} \mathbf{1}\{d(x_i, x_j) > 2\epsilon + 4\gamma_n\}, \quad (27)$$

where the indices  $i, j$  run over  $[s_n]$ . We have that  $\mu_n(\mathcal{X}) = \mu(\mathcal{X}) \leq \nu(\mathcal{X}) = \nu(\mathcal{X})$ . Define a coupling  $\pi_n \in \Pi(\mu_n, \nu_n)$  supported on  $H_{s_n} \times H_{s_n}$  using the optimal solution  $\{x_{ij}\}_{i,j \in [s_n]}$  to the minimization in (27) by setting  $\pi_n(i, j) = x_{ij}^*$ . Let  $T_n \subseteq H_{s_n}$  be the set that achieves the maximum in (27).

We will now construct a candidate coupling for the infimum in (8). Since  $\mu, \nu$  are finite measures on a Polish space, they are tight (see for example, Theorem 1.3 in [3]). Hence, given a  $\delta > 0$ , there exists a compact set  $K \subseteq \mathcal{X}$  such that  $\min\{\mu(K^c), \nu(K^c)\} < \delta/3$ . Since  $\mu_n$  and  $\nu_n$  converge weakly to  $\mu$  and  $\nu$  respectively, choose  $N$  large enough so that  $\min\{\mu_n(K^c), \nu_n(K^c)\} < \delta/2$  for all  $n \geq N$ . Let  $\nu'_n$  be the second marginal of the coupling  $\pi_n$ . Then,  $\nu'_n \preceq \nu_n$ . By union bound, we have the following.

$$\pi_n((K \times K)^c) \leq \mu_n(K^c) + \nu'_n(K^c) \leq \mu_n(K^c) + \nu_n(K^c) < \delta. \quad (28)$$

Hence, the sequence  $(\pi_n)_{n \geq N}$  is uniformly tight. Hence, by Prokhorov's theorem (for reference, see Theorem 5.1 in [3]), there is a subsequence  $(\pi_{n_k})$  of  $(\pi_n)_{n \geq N}$  that converges weakly to some measure  $\pi^* \in \mathcal{M}(\mathcal{X} \times \mathcal{X})$ . Moreover,  $\pi^* \in \Pi(\mu, \nu)$  by virtue of the constraints imposed on the converging subsequence of  $(\pi_n)_{n \geq N}$ .

Let  $\Phi = \sup_{A \in \mathcal{B}(\mathcal{X})} \mu(A) - \nu(A^{2\epsilon})$  and  $\Psi = \mathcal{T}_{c_\epsilon}(\mu, \nu)$ . For any  $n$  we have,

$$\begin{aligned} \pi_n(d(x_i, x_j) > 2\epsilon + 4\gamma_n) &\stackrel{(i)}{=} \mu_n(T_n) - \nu_n(T_n^{2\epsilon+4\gamma_n}) \\ &\stackrel{(ii)}{\leq} (\mu(T_n^{\gamma_n}) + \gamma_n) - (\nu((T_n^{2\epsilon+4\gamma_n})^{-\gamma_n}) - \gamma_n) \\ &\stackrel{(iii)}{\leq} \mu(T_n^{\gamma_n}) - \nu((T_n^{2\epsilon+4\gamma_n-\gamma_n-\gamma_n/2}) + 2\gamma_n) \\ &\leq \mu(T_n^{2\gamma_n}) - \nu((T_n^{2\epsilon+2\gamma_n}) + 2\gamma_n) \\ &\stackrel{(iv)}{\leq} \Phi + 2\gamma_n, \end{aligned} \quad (29)$$

where (i) follows from the definition of  $\pi_n$  and  $T_n$ , (ii) follows from (26), (iii) follows from Lemma A.5 and (iv) follows from the definition of  $\Phi$ . Further,

$$\begin{aligned} \Psi &= \inf_{\pi \in \Pi(\mu, \nu)} \pi[d(x, x') > 2\epsilon] \\ &\stackrel{(i)}{\leq} \pi^*[d(x, x') > 2\epsilon] \\ &\stackrel{(ii)}{\leq} \liminf_{n_k} \pi_{n_k}[d(x, x') > 2\epsilon] \\ &\leq \limsup_n \pi_n[d(x, x') \geq 2\epsilon] \\ &\stackrel{(iii)}{\leq} \Phi, \end{aligned} \quad (30)$$

where (i) follows because  $\pi^* \in \Pi(\mu, \nu)$ , (ii) follows from Portmanteau's theorem because  $(\pi_{n_k})$  that converges to  $\pi^*$  and the set  $\{(x, x') \in \mathcal{X}^2 : d(x, x') > 2\epsilon\}$  is an open set, and (iii) follows by taking  $n \rightarrow \infty$  in (29).

To show the inequality  $\Phi \leq \Psi$ , consider a sequence of measures  $(\lambda_n)_{n=1}^\infty$  such that  $\lambda_n \in \Pi(\mu, \nu)$  and  $\lim_n \lambda_n[d(x, x') > \epsilon] = \Psi$ . For any  $A \in \mathcal{B}(\mathcal{X})$ ,

$$\begin{aligned} \mu(A) &= \lambda_n[x \in A, x' \in A^\epsilon] + \lambda_n[x \in A, x' \notin A^\epsilon] \\ &\leq \nu(A^\epsilon) + \lambda_n[d(x, x') > \epsilon]. \end{aligned}$$

Letting  $n \rightarrow \infty$ , we have  $\mu(A) - \nu(A^\epsilon) \leq \Psi$  for all  $A \in \mathcal{B}(\mathcal{X})$ . Hence,  $\Phi \leq \Psi$ . Combining this with (30), we conclude  $\Phi = \Psi$ .  $\square$

*Proof of Lemma 6.1.* We have,

$$\begin{aligned} \sup_{A \in \mathcal{B}(\mathcal{X})} \mu(A) - \nu(A^{2\epsilon}) &\stackrel{(i)}{=} \sup_{A \text{ closed}} \mu(A) - \nu(A^{2\epsilon}) \\ &\leq \sup_{A \text{ closed}} \mu((A^{\oplus\epsilon})^{\ominus\epsilon}) - \mu((A^{\oplus\epsilon})^{\oplus\epsilon}) \\ &\stackrel{(iii)}{\leq} \sup_{A \in \mathcal{B}(\mathcal{X})} \mu(A^{\ominus\epsilon}) - \nu(A^{\oplus\epsilon}), \end{aligned}$$

where (i) follows because we may assume that the supremum of  $\mu(A) - \nu(A^{2\epsilon})$  is achieved by a closed set. Indeed,  $\mu(\bar{A}) - \nu(\bar{A}^{2\epsilon}) \geq \mu(A) - \nu(A^{2\epsilon})$  because  $\bar{A} \supseteq A$  and  $\bar{A}^{2\epsilon} = A^{2\epsilon}$ . (ii) follows from the following two facts: 1)  $A \subseteq (A^{\oplus\epsilon})^{\ominus\epsilon}$  (see Lemma 3.3 in [35]), and 2)  $A^\epsilon = (A^{\oplus\epsilon})^{\oplus\epsilon}$  for closed sets  $A$  (see Lemma 3.2 in [35]). (iii) follows from Lemma 4.2 because  $\mu, \nu \in \overline{\mathcal{P}}(\mathcal{X})$  and  $A^{\ominus\epsilon}, (A^{\oplus\epsilon})^{\oplus\epsilon} \in \overline{\mathcal{B}}(\mathcal{X})$  whenever  $A \in \mathcal{B}(\mathcal{X})$ .

Now, we show that the above inequality also holds in the opposite direction. Let  $\mu' = \mu/t \in \overline{\mathcal{P}}(\mathcal{X})$  for some fixed  $t > 0$ . For  $x, y \in \mathcal{X}$ , define the cost function  $c(x, y) = \mathbb{1}\{d(x, y) > 2\epsilon\}$ . For any  $\nu' \in \overline{\mathcal{P}}(\mathcal{X})$ , we have the following from Kantorovich duality theorem.

$$D_\epsilon(\mu', \nu') = \sup_{\phi(x) + \psi(y) \leq c(x, y)} \int \phi d\mu' + \int \psi d\nu',$$

For any  $A \in \mathcal{B}(\mathcal{X})$ , define  $\phi'(x) = \mathbb{1}\{x \in A^{\ominus\epsilon}\}$  and  $\psi'(y) = -\mathbb{1}\{y \in A^{\oplus\epsilon}\}$ . We will now show that  $\phi'(x) + \psi'(y) \leq c(x, y)$ . If  $x, y$  are such that  $c(x, y) = 1$ , the inequality holds trivially. Suppose on the other hand,  $x, y$  are such that  $c(x, y) = 0$ . Then  $d(x, y) \leq 2\epsilon$ . Hence, for any  $x \in A^{\ominus\epsilon}$ , we have  $y \in (A^{\ominus\epsilon})^{\oplus 2\epsilon} = ((A^{\ominus\epsilon})^{\oplus\epsilon})^{\oplus\epsilon} \subseteq A^{\oplus\epsilon}$  (the set inclusion here follows from Lemma 3.3 in [35]). Therefore,

$$\phi'(x) + \psi'(y) = \mathbb{1}\{x \in A^{\ominus\epsilon}\} - \mathbb{1}\{y \in A^{\oplus\epsilon}\} = 0 = c(x, y).$$

Hence,

$$D_\epsilon(\mu', \nu') \geq \int \phi' d\mu' + \int \psi' d\nu' = \mu'(A^{\ominus\epsilon}) - \nu'(A^{\oplus\epsilon}).$$

Now,

$$\begin{aligned} \sup_{A \in \mathcal{B}(\mathcal{X})} \mu(A) - \nu(A^{2\epsilon}) &\stackrel{(*)}{=} t \inf_{\substack{\nu' \in \overline{\mathcal{P}}(\mathcal{X}) \\ \nu' \preceq \nu/t}} D_\epsilon(\mu', \nu') \\ &\geq t \inf_{\substack{\nu' \in \overline{\mathcal{P}}(\mathcal{X}) \\ \nu' \preceq \nu/t}} \mu'(A^{\ominus\epsilon}) - \nu'(A^{\oplus\epsilon}) \\ &= t\mu'(A^{\ominus\epsilon}) - t \sup_{\substack{\nu' \in \overline{\mathcal{P}}(\mathcal{X}) \\ \nu' \preceq \nu/t}} \nu'(A^{\oplus\epsilon}) \\ &\geq \mu(A^{\ominus\epsilon}) - t \frac{\nu}{t}(A^{\oplus\epsilon}) \\ &= \mu(A^{\ominus\epsilon}) - \nu(A^{\oplus\epsilon}), \end{aligned}$$

where (\*) follows from Theorem 6.1. Since the above inequality is valid for any  $A \in \mathcal{B}(\mathcal{X})$ , we get the following.

$$\sup_{A \in \mathcal{B}(\mathcal{X})} \mu(A) - \nu(A^{2\epsilon}) \geq \sup_{A \in \mathcal{B}(\mathcal{X})} \mu(A^{\ominus\epsilon}) - \nu(A^{\oplus\epsilon}).$$

□

*Proof of Theorem 6.2.*

$$\begin{aligned} \inf_{A \in \mathcal{B}(\mathcal{X})} R_{\oplus\epsilon}(\ell_{0/1}, A) &= \inf_{A \in \mathcal{B}(\mathcal{X})} \frac{1}{T+1} [Tp_0(A^{\oplus\epsilon}) + p_1((A^c)^{\oplus\epsilon})] \\ &= \frac{1}{T+1} \left[ 1 - \sup_{A \in \mathcal{B}(\mathcal{X})} (p_1(A^{\ominus\epsilon}) - Tp_0(A^{\oplus\epsilon})) \right] \\ &\stackrel{(i)}{=} \frac{1}{T+1} \left[ 1 - \sup_{A \in \mathcal{B}(\mathcal{X})} (p_1(A) - Tp_0(A^{2\epsilon})) \right] \\ &\stackrel{(ii)}{=} \frac{1}{T+1} \left[ 1 - \inf_{\substack{q \in \mathcal{P}(\mathcal{X}): \\ q \leq Tp_0}} D_\epsilon(q, p_1) \right], \end{aligned}$$

where (i) follows from Lemma 6.1 and (ii) follows from Theorem 6.1. □

## E Proofs from Section 7

*Proof of Theorem 7.1.* By Lemma 5.2, the set-valued maps  $A \mapsto p_0(A^{\oplus\epsilon})$  and  $A^c \mapsto p_1((A^c)^{\oplus\epsilon})$  are 2-alternating capacities. Hence, the existence of  $A^* \in \mathcal{L}(\mathcal{X})$  that attains the infimum on the right in (12) follows from Lemma 3.1 in [21] and the equality  $R_{\oplus\epsilon}(\ell_{0/1}, A) = R_{\Gamma_\epsilon}(\ell_{0/1}, A)$  proved in Theorem 5.2. By Theorem 4.1 in [21], there exist  $q_0, q_1 \in \mathcal{P}(\mathcal{X})$  such that  $W_\infty(p_i, q_i) \leq \epsilon$  for  $i = 0, 1$  and,

$$\inf_{A \in \mathcal{L}(\mathcal{X})} \sup_{W_\infty(p_0, p'_0), W_\infty(p_1, p'_1) \leq \epsilon} r(A, p_0, p_1) = \inf_{A \in \mathcal{L}(\mathcal{X})} r(A, q_0, q_1).$$

Hence,

$$\begin{aligned} \inf_{A \in \mathcal{L}(\mathcal{X})} \sup_{W_\infty(p_0, p'_0), W_\infty(p_1, p'_1) \leq \epsilon} r(A, p_0, p_1) &= \inf_{A \in \mathcal{A}} r(A, q_0, q_1) \\ &\leq \sup_{W_\infty(p_0, p'_0), W_\infty(p_1, p'_1) \leq \epsilon} \inf_{A \in \mathcal{L}(\mathcal{X})} r(A, p_0, p_1). \end{aligned}$$

The desired result follows from combining the above inequality with the max-min inequality (11). Clearly,  $q_0 = p_0^*$  and  $q_1 = p_1^*$ . □

**Lemma E.1 (Max-min Inequality).** Let  $p_0, p_1 \in \mathcal{P}(\mathcal{X})$  and let  $\epsilon \geq 0$ . For  $T > 0$ , define  $r : \mathcal{B}(\mathcal{X}) \times \mathcal{P}(\mathcal{X}) \times \mathcal{P}(\mathcal{X}) \rightarrow [0, 1]$  as in (10). Then,

$$\sup_{\substack{W_\infty(p_0, p'_0) \leq \epsilon \\ W_\infty(p_1, p'_1) \leq \epsilon}} \inf_{A \in \mathcal{B}(\mathcal{X})} r(A, p'_0, p'_1) \leq \inf_{A \in \mathcal{B}(\mathcal{X})} \sup_{\substack{W_\infty(p_0, p'_0) \leq \epsilon \\ W_\infty(p_1, p'_1) \leq \epsilon}} r(A, p'_0, p'_1). \quad (31)$$

*Proof.* For any  $A \in \mathcal{B}(\mathcal{X})$  and  $p'_0, p'_1$  such that  $W_\infty(p_i, p'_i) \leq \epsilon$  ( $i = 0, 1$ ), we have

$$\inf_{A \in \mathcal{B}(\mathcal{X})} r(A, p'_0, p'_1) \leq r(A, p'_0, p'_1).$$

Taking supremum over  $p'_0$  and  $p'_1$  such that  $W_\infty(p_i, p'_i) \leq \epsilon$  for  $i \in \{0, 1\}$  on both sides of the above inequality, we get the following for any  $A \in \mathcal{B}(\mathcal{X})$ .

$$\sup_{W_\infty(p_0, p'_0), W_\infty(p_1, p'_1) \leq \epsilon} \inf_{A \in \mathcal{B}(\mathcal{X})} r(A, p'_0, p'_1) \leq \sup_{W_\infty(p_0, p'_0), W_\infty(p_1, p'_1) \leq \epsilon} r(A, p'_0, p'_1).$$

Since the above inequality holds for any  $A \in \mathcal{B}(\mathcal{X})$ , we have,

$$\sup_{W_\infty(p_0, p'_0), W_\infty(p_1, p'_1) \leq \epsilon} \inf_{A \in \mathcal{B}(\mathcal{X})} r(A, p'_0, p'_1) \leq \inf_{A \in \mathcal{B}(\mathcal{X})} \sup_{W_\infty(p_0, p'_0), W_\infty(p_1, p'_1) \leq \epsilon} r(A, p'_0, p'_1).$$

□

*Proof of Theorem 7.2.* Consider any  $\mu'$  and  $\nu'$  such that  $W_\infty(\mu, \mu') \leq \epsilon$  and  $W_\infty(\nu, \nu') \leq \epsilon$ . Then there exist  $\gamma_\mu \in \Pi(\mu, \mu')$  and  $\gamma_\nu \in \Pi(\nu, \nu')$  such that

$$\begin{aligned}\mathbb{P}_{(x, x') \sim \gamma_\mu}(d(x, x') > \epsilon) &= 0, \\ \mathbb{P}_{(x, x') \sim \gamma_\nu}(d(x, x') > \epsilon) &= 0.\end{aligned}$$

Let  $\gamma' \in \Pi(\mu', \nu')$  be the coupling that achieves the optimal transport cost  $D_{TV}(\mu', \nu')$ . Construct a coupling  $\gamma_0 \in \Pi(\mu, \nu)$  as  $\gamma_0 = \gamma_\mu \circ \gamma' \circ \gamma_\nu$ . Then,

$$\begin{aligned}D_\epsilon(\mu, \nu) &\leq \int_{\mathcal{X}^2} \mathbb{1}\{d(x, x') > 2\epsilon\} d\gamma_0 \\ &\leq \int_{\mathcal{X}^2} \mathbb{1}\{d(x, x') > 0\} d\gamma' \\ &= D_{TV}(\mu', \nu').\end{aligned}$$

Since the above inequality is true for any  $\mu'$  and  $\nu'$  such that  $W_\infty(\mu, \mu') \leq \epsilon$  and  $W_\infty(\nu, \nu') \leq \epsilon$ , we have the following inequality.

$$D_\epsilon(\mu, \nu) \leq \inf_{W_\infty(p_0, p'_0), W_\infty(p_1, p'_1) \leq \epsilon} D_{TV}(\mu', \nu').$$

Now we will show the above inequality in the reverse direction. Let  $\gamma \in \Pi(\mu, \nu)$  be the coupling that achieves the optimal transport cost for  $D_\epsilon(\mu, \nu)$ . Let  $M : \mathcal{X}^2 \rightarrow \mathcal{X}$  be a measurable midpoint map. (See [13] for why such a map exists.) That is, for all  $(x, x') \in \mathcal{X}^2$  we have

$$d(x, M(x, x')) = d(x', M(x, x')) = \frac{1}{2}d(x, x').$$

Consider a transport map  $T : \mathcal{X}^2 \rightarrow \mathcal{X}^2$  defined as

$$T(x, x') = \begin{cases} (M(x, x'), M(x, x')) & d(x, x') \leq 2\epsilon, \\ (x, x') & \text{otherwise.} \end{cases}$$

$T$  is measurable because it is piece-wise measurable on measurable sets. Further, it follows from the definition of  $M$  that each coordinate of a point  $(x, x')$  is transported by  $T$  by a distance no further than  $\epsilon$ . Let  $\mu_0$  and  $\nu_0$  be the probability measures corresponding to the first and second marginals of  $T_{\#}\gamma$  respectively. Then,  $W_\infty(\mu, \mu_0) \leq \epsilon$  and  $W_\infty(\nu, \nu_0) \leq \epsilon$ . Hence,

$$\begin{aligned}D_\epsilon(\mu, \nu) &= \int_{\mathcal{X}^2} \mathbb{1}\{d(x, x') > 2\epsilon\} d\gamma \\ &= \int_{\mathcal{X}^2} \mathbb{1}\{d(x, x') > 0\} d\gamma_{\#T} \\ &\geq D_{TV}(\mu_0, \nu_0) \\ &\geq \inf_{W_\infty(p_0, p'_0), W_\infty(p_1, p'_1) \leq \epsilon} D_{TV}(\mu', \nu').\end{aligned}$$

Combining with the reverse inequality that we proved above, it is clear that the infimum over  $D_{TV}$  is attained by  $\mu_0$  and  $\nu_0$ .  $\square$

*Proof of Lemma 7.1.* The first equality in (14) follows from Theorem 7.2. For the second equality, we have the following.

$$\begin{aligned}
& \inf_{\substack{q \in \overline{\mathcal{P}}(\mathcal{X}): \\ q \preceq T p_0}} D_\epsilon(q, p_1) \stackrel{(i)}{=} 1 - (T+1) \inf_{A \in \mathcal{B}(\mathcal{X})} R_{\oplus \epsilon}(\ell_{0/1}, A) \\
& \stackrel{(ii)}{=} 1 - (T+1) \inf_{A \in \mathcal{B}(\mathcal{X})} R_{\Gamma_\epsilon}(\ell_{0/1}, A) \\
& = 1 - (T+1) \inf_{A \in \mathcal{B}(\mathcal{X})} \sup_{\substack{W_\infty(p_0, p'_0) \leq \epsilon \\ W_\infty(p_1, p'_1) \leq \epsilon}} r(A, p'_0, p'_1) \\
& \stackrel{(iii)}{\leq} 1 - (T+1) \sup_{\substack{W_\infty(p_0, p'_0) \leq \epsilon \\ W_\infty(p_1, p'_1) \leq \epsilon}} \inf_{A \in \mathcal{B}(\mathcal{X})} r(A, p'_0, p'_1) \\
& = \inf_{\substack{W_\infty(p_0, p'_0) \leq \epsilon \\ W_\infty(p_1, p'_1) \leq \epsilon}} [1 - (T+1) \inf_{A \in \mathcal{B}(\mathcal{X})} r(A, p'_0, p'_1)] \\
& \stackrel{(iv)}{\leq} \inf_{\substack{W_\infty(p_0, p'_0) \leq \epsilon \\ W_\infty(p_1, p'_1) \leq \epsilon}} \inf_{q' \in \overline{\mathcal{P}}(\mathcal{X}): \\ q' \preceq T p'_0} D_{TV}(q', p'_1),
\end{aligned}$$

where (i) follows from Theorem 6.2, (ii) from Theorem 5.1, (iii) from Lemma E.1, and (iv) again from Theorem 6.2 with  $\epsilon = 0$ .

We will now show the inequality in the opposite direction. That is, we will show the following.

$$\inf_{\substack{q \in \overline{\mathcal{P}}(\mathcal{X}): \\ q \preceq T p_0}} \inf_{W_\infty(q, q') \leq \epsilon} D_{TV}(q', p'_1) \geq \inf_{\substack{W_\infty(p_0, p'_0) \leq \epsilon \\ W_\infty(p_1, p'_1) \leq \epsilon}} \inf_{q' \in \overline{\mathcal{P}}(\mathcal{X}): \\ q' \preceq T p'_0} D_{TV}(q', p'_1) \quad (32)$$

Consider arbitrary probability measures  $q', p'_1 \in \overline{\mathcal{P}}(\mathcal{X})$  generated in accordance with the constraints over the infimum terms on the left hand side of the above inequality. That is, let  $q'$  and  $p'_1$  be such that  $W_\infty(q, q') \leq \epsilon$  and  $W_\infty(p_1, p'_1) \leq \epsilon$  where  $q \preceq T p_0$ . We will now construct  $p'_0 \in \overline{\mathcal{P}}(\mathcal{X})$  such that  $q' \preceq T p'_0$  and  $W_\infty(p_0, p'_0) \leq \epsilon$ . This will show that the set of  $q', p'_1 \in \overline{\mathcal{P}}(\mathcal{X})$  satisfying the constraints over the infimum terms on the right hand side is a superset of the corresponding set on the right hand side, and hence prove the above inequality.

Define a probability measure  $p'_0 \in \overline{\mathcal{P}}(\mathcal{X})$  as  $p'_0(A) = p_0(A) + \frac{1}{T}q'(A) - \frac{1}{T}q(A)$  for  $A \in \mathcal{B}(\mathcal{X})$ . To show that  $p'_0$  is a valid probability measure, we have the following.

$$\begin{aligned}
p'_0(\mathcal{X}) &= p_0(\mathcal{X}) + \frac{1}{T}q'(\mathcal{X}) - \frac{1}{T}q(\mathcal{X}) = 1 \\
p'_0(A) &= \frac{1}{T}(T p_0(A) - q(A)) + \frac{1}{T}q'(A) \geq \frac{1}{T}q'(A) \geq 0.
\end{aligned}$$

The above equality also shows that  $q' \preceq T p'_0$ . We will now show that  $W_\infty(p_0, p'_0) \leq \epsilon$ . Since  $W_\infty(q, q') \leq \epsilon$ , there exists  $\gamma \in \Pi(q, q')$  such that  $\gamma(\{(x, x') \in \mathcal{X}^2 : d(x, x') \leq 2\epsilon\}) = 1$ . Define  $\gamma' \in \Pi(p_0, p'_0)$  as follows for  $A \in \mathcal{B}(\mathcal{X}^2)$ .

$$\gamma'(A) = p_0(\{x \in \mathcal{X} : (x, x) \in A\}) + \frac{1}{T}\gamma(A) - \frac{1}{T}q(\{x \in \mathcal{X} : (x, x) \in A\}).$$

To see that  $\gamma' \in \Pi(p_0, p'_0)$ , we have the following for  $A_1, A_2 \in \mathcal{B}(\mathcal{X})$ .

$$\begin{aligned}
\gamma'(A_1 \times \mathcal{X}) &= p_0(A_1) + \frac{1}{T}q(A_1) - \frac{1}{T}q(A_1) = p_0(A_1), \\
\gamma'(\mathcal{X} \times A_2) &= p_0(A_2) + \frac{1}{T}q'(A_2) - \frac{1}{T}q(A_2) = p'_0(A_2).
\end{aligned}$$

Moreover,

$$\gamma'(\{(x, x') \in \mathcal{X}^2 : d(x, x') \leq 2\epsilon\}) = p_0(\mathcal{X}) + \frac{1}{T}\gamma(\{(x, x') \in \mathcal{X}^2 : d(x, x') \leq 2\epsilon\}) - \frac{1}{T}q(\mathcal{X}) = 1.$$

Therefore,  $W_\infty(p_0, p'_0) \leq \epsilon$ .  $\square$



*Proof of Theorem 7.4.* Without loss of generality, we assume  $T \geq 1$ . (If  $T < 1$ , we simply repeat the proof with labels 0 and 1 swapped.)

$$\begin{aligned}
\inf_{A \in \mathcal{B}(\mathcal{X})} \sup_{\substack{W_\infty(p_0, p'_0) \leq \epsilon \\ W_\infty(p_1, p'_1) \leq \epsilon}} r(A, p'_0, p'_1) &= \inf_{A \in \mathcal{B}(\mathcal{X})} R_{\Gamma_\epsilon}(\ell_{0/1}, A) \\
&\stackrel{(i)}{=} \inf_{A \in \mathcal{B}(\mathcal{X})} R_{\oplus_\epsilon}(\ell_{0/1}, A) \\
&\stackrel{(ii)}{=} \frac{1}{T+1} \left[ 1 - \inf_{\substack{q \in \overline{\mathcal{P}}(\mathcal{X}): \\ q \preceq T p_0}} D_\epsilon(p_0, p_1) \right] \\
&\stackrel{(iii)}{=} \frac{1}{T+1} \left[ 1 - \inf_{\substack{W_\infty(p_0, p'_0) \leq \epsilon \\ W_\infty(p_1, p'_1) \leq \epsilon}} \inf_{\substack{q' \in \overline{\mathcal{P}}(\mathcal{X}): \\ q' \preceq T p'_0}} D_{TV}(q', p'_1) \right] \\
&= \sup_{\substack{W_\infty(p_0, p'_0) \leq \epsilon \\ W_\infty(p_1, p'_1) \leq \epsilon}} \frac{1}{T+1} \left[ 1 - \inf_{\substack{q' \in \overline{\mathcal{P}}(\mathcal{X}): \\ q' \preceq T p'_0}} D_{TV}(q', p'_1) \right] \\
&\stackrel{(iv)}{=} \sup_{\substack{W_\infty(p_0, p'_0) \leq \epsilon \\ W_\infty(p_1, p'_1) \leq \epsilon}} \inf_{A \in \mathcal{B}(\mathcal{X})} r(A, p'_0, p'_1),
\end{aligned}$$

where (i) follows from Theorem 5.1, (ii) from Theorem 6.2, (iii) from Lemma 7.1 and (iv) follows again from Theorem 6.2 with  $\epsilon = 0$ .  $\square$
